# Supplementary material for: Studies of novel trifluoroacetylated diaryl hydrazone molecular photoswitches in solution and in the solid state
Source: Royal Society of Chemistry journal article supplement (doi:10.1039/d1nj01677f), 2021-01-01
Supplement: d1nj01677f1.pdf [file d1nj01677f1.pdf]

**Studies of novel trifluoromethyl ketone containing hydrazone molecular  
photoswitches in solution and in the solid state**

Gianluca Accorsi,<sup>\*a</sup> Agostina-Lina Capodilupo<sup>a</sup>, Rosa María Claramunt<sup>b</sup>, Guy J. Clarkson<sup>c</sup>, A. Farrán<sup>b\*</sup>, Francesco G. Gatti<sup>d</sup>, Salvador León<sup>e</sup> and Silvia Venturi.<sup>d</sup>

<sup>a</sup>*CNR NANOTEC - Institute of Nanotechnology c/o Campus Ecotekne, University of Salento, Via Monteroni, 73100 Lecce, Italy.*

<sup>b</sup>*Departamento de Química Orgánica y Bio-Orgánica, Facultad de Ciencias, Universidad Nacional de Educación a Distancia, Senda del Rey, 4, E-28040 Madrid, Spain*

<sup>c</sup>*Chemistry Department, University of Warwick, Library Rd. Coventry CV4 7AL United Kingdom*

<sup>d</sup>*Dipartimento di Chimica, Materiali ed Ingegneria Chimica "Giulio Natta", Politecnico di Milano, Via Mancinelli 7, 20131 Milano, Italy.*

<sup>e</sup>*Departamento de Ingeniería Química, Universidad Politécnica de Madrid, ETSIM, José Gutiérrez Abascal 2, 28006 Madrid, Spain*

|                                                         |           |
|---------------------------------------------------------|-----------|
| <b>1. Photophysical data</b>                            | <b>3</b>  |
| <b>2. NMR Spectroscopy</b>                              | <b>10</b> |
| <b>3. X-Ray Analysis</b>                                | <b>25</b> |
| <b>4. DFT calculations</b>                              | <b>35</b> |
| <b>5. Kinetic studies of back thermal isomerization</b> | <b>37</b> |
| <b>6. References</b>                                    | <b>46</b> |

## 1. Photophysical data

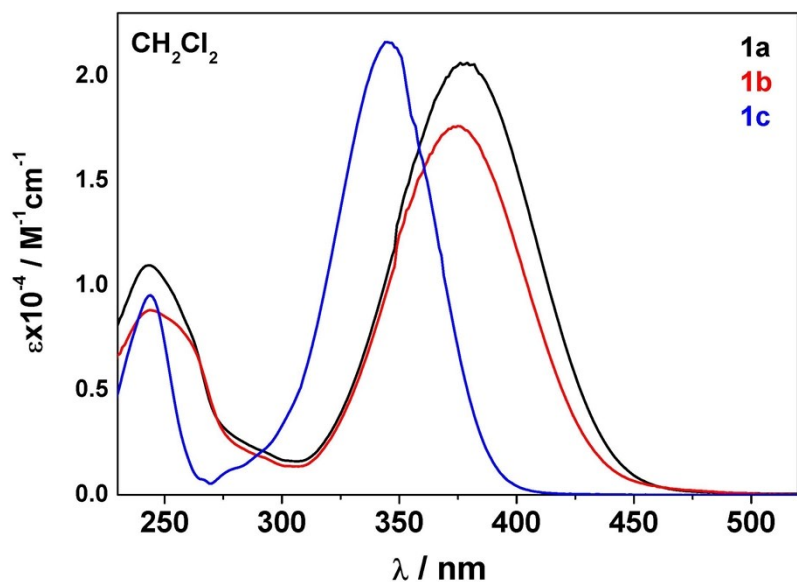

**Fig.ESI1** Absorption profiles of (*E*)-**1a** (black), (*E*)-**1b** (red) and (*E*)-**1c** (blue) in  $\text{CH}_2\text{Cl}_2$  at room temperature.

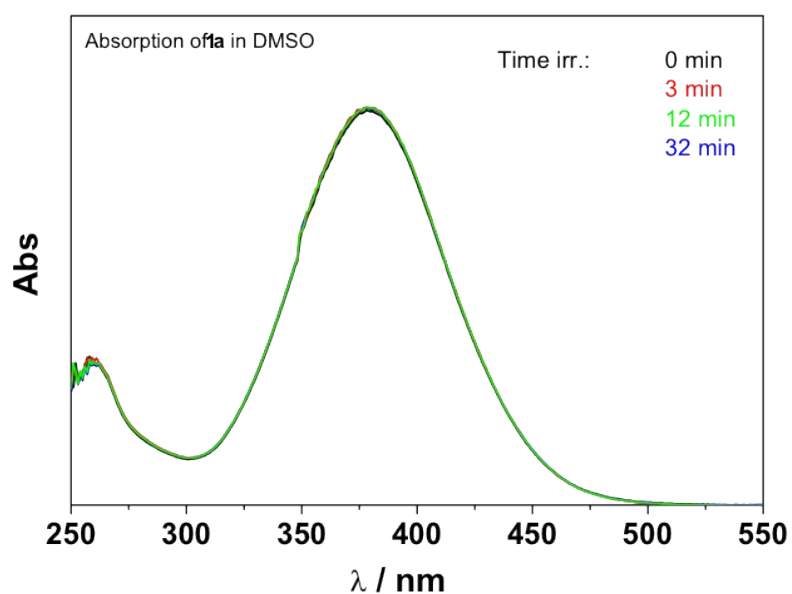

**Fig.ESI2** Absorption profiles of (*E*)-**1a** in DMSO at room temperature under different irradiation times at 350 nm ( $\lambda_{\text{IRR}}$ : 5 microwatt/mm<sup>2</sup>).

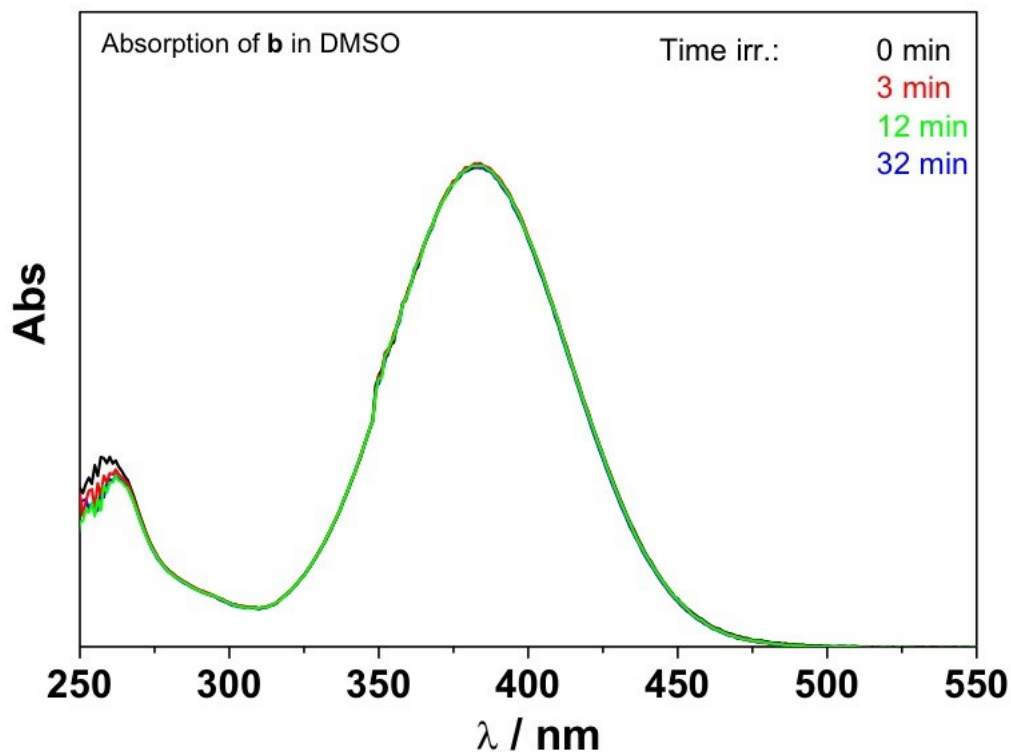

**Fig.ESI3** Absorption profiles of (*E*)-**1b** in DMSO at room temperature under different irradiation times at 350 nm ( $\lambda_{\text{IRR}}$ : 5 microwatt/mm<sup>2</sup>).

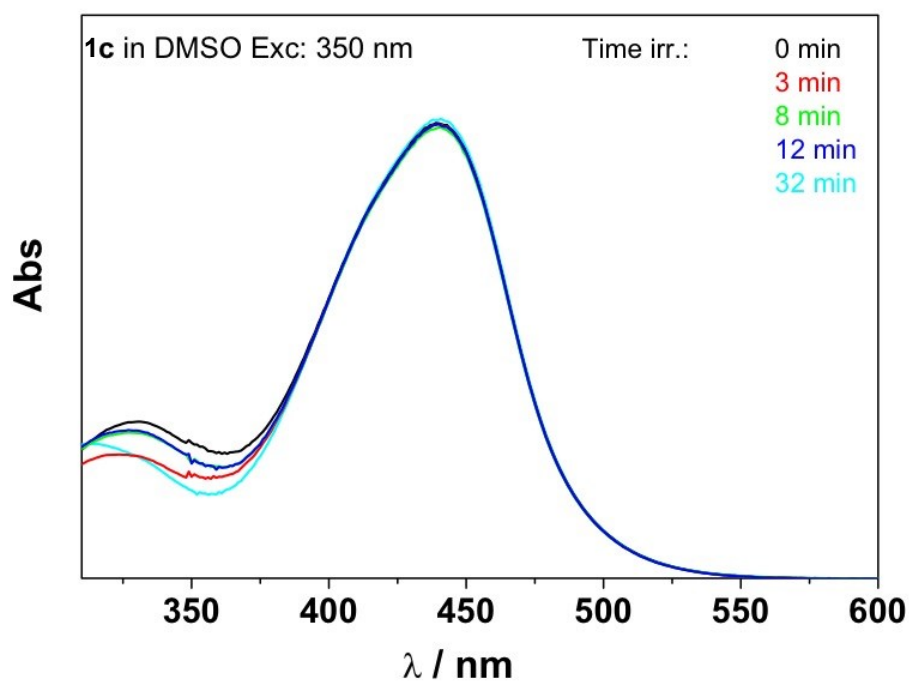

**Fig. ESI4.** Absorption profiles of (*E*)-**1c** in DMSO at room temperature under different irradiation times at 350 nm ( $\lambda_{\text{IRR}}$ : 5 microwatt/mm<sup>2</sup>).

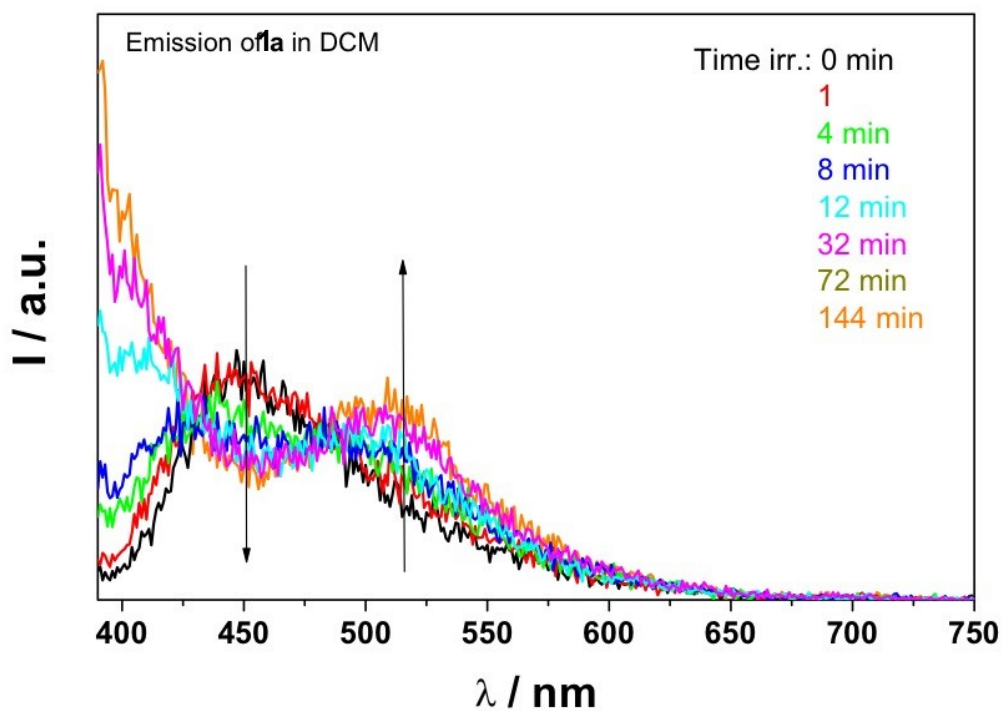

**Fig. ESI5** Emission profiles of (*E*)-**1a** in CH<sub>2</sub>Cl<sub>2</sub> at room temperature under different irradiation times at 350 nm ( $\lambda_{\text{IRR}}$ : 5 microwatt/mm<sup>2</sup>).

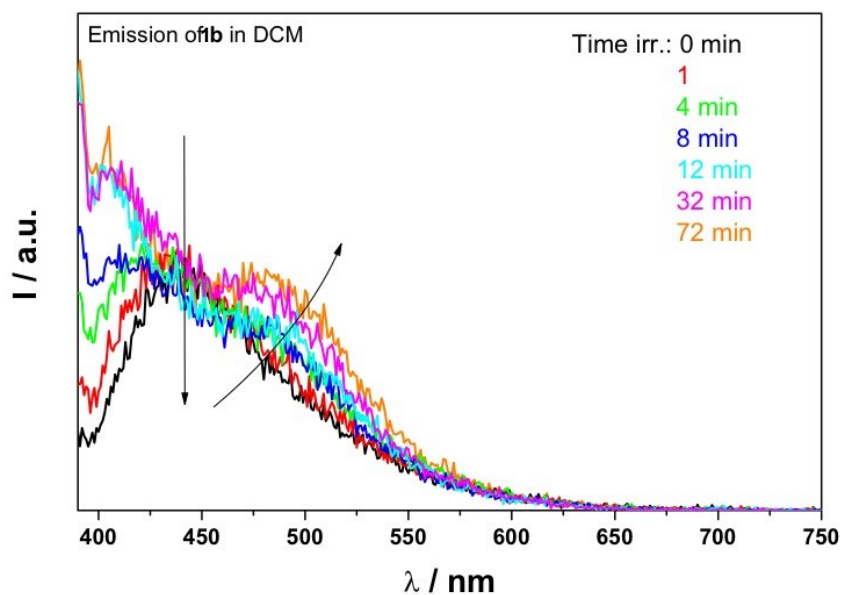

**Fig. ESI6** Emission profiles of (*E*)-**1b** in CH<sub>2</sub>Cl<sub>2</sub> at room temperature under different irradiation times at 350 nm ( $\lambda_{\text{IRR}}$ : 5 microwatt/mm<sup>2</sup>).

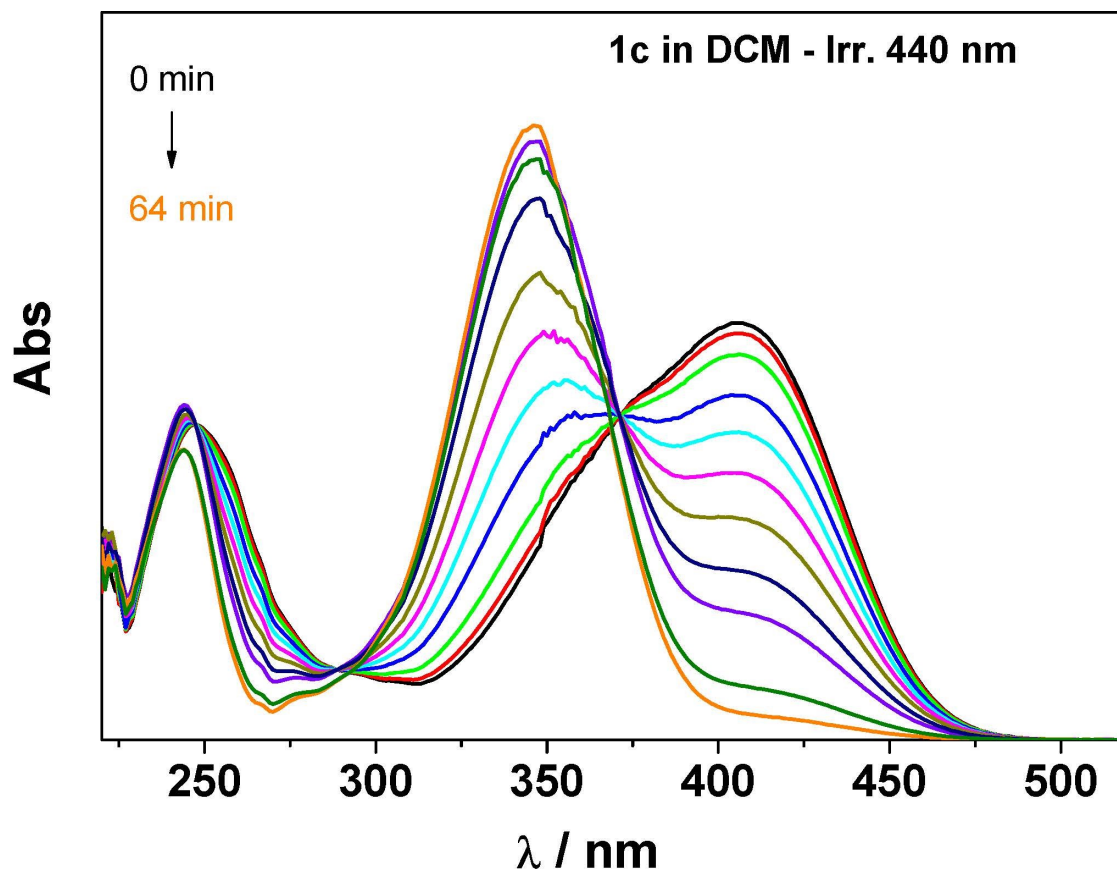

**Fig. ESI7.** Absorption profiles of (*E*)-**1c** in CH<sub>2</sub>Cl<sub>2</sub> at room temperature under different irradiation times at 440 nm ( $\lambda_{\text{IRR}}$ : 23 microwatt/mm<sup>2</sup>).

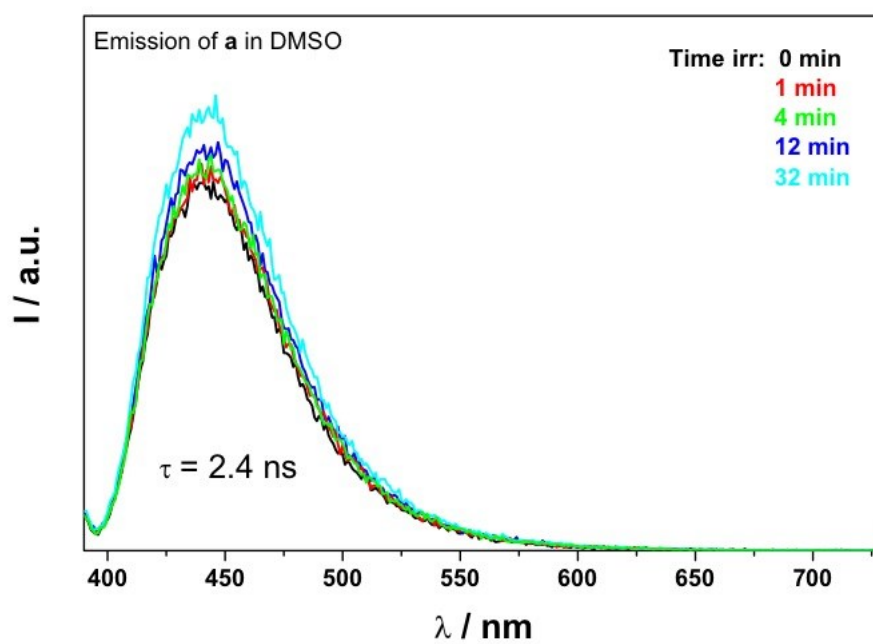

**Fig. ESI8.** Emission profiles of (*E*)-**1a** in DMSO at room temperature under different irradiation times at 350 nm ( $\lambda_{\text{IRR}}$ : 5 microwatt/mm<sup>2</sup>).

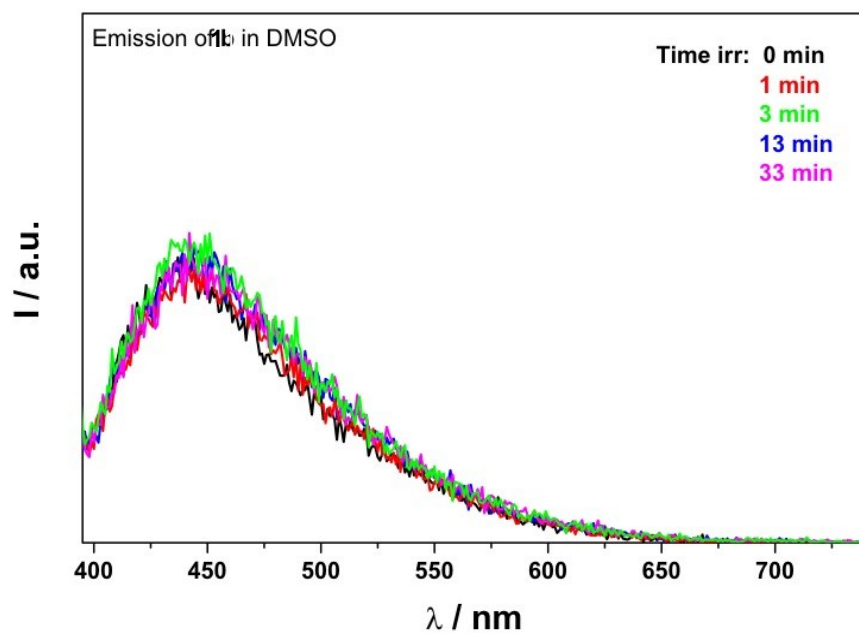

**Fig. ESI9.** Emission profiles of (*E*)-**1b** in DMSO at room temperature under different irradiation times at 350 nm ( $\lambda_{\text{IRR}}$ : 5 microwatt/mm<sup>2</sup>).

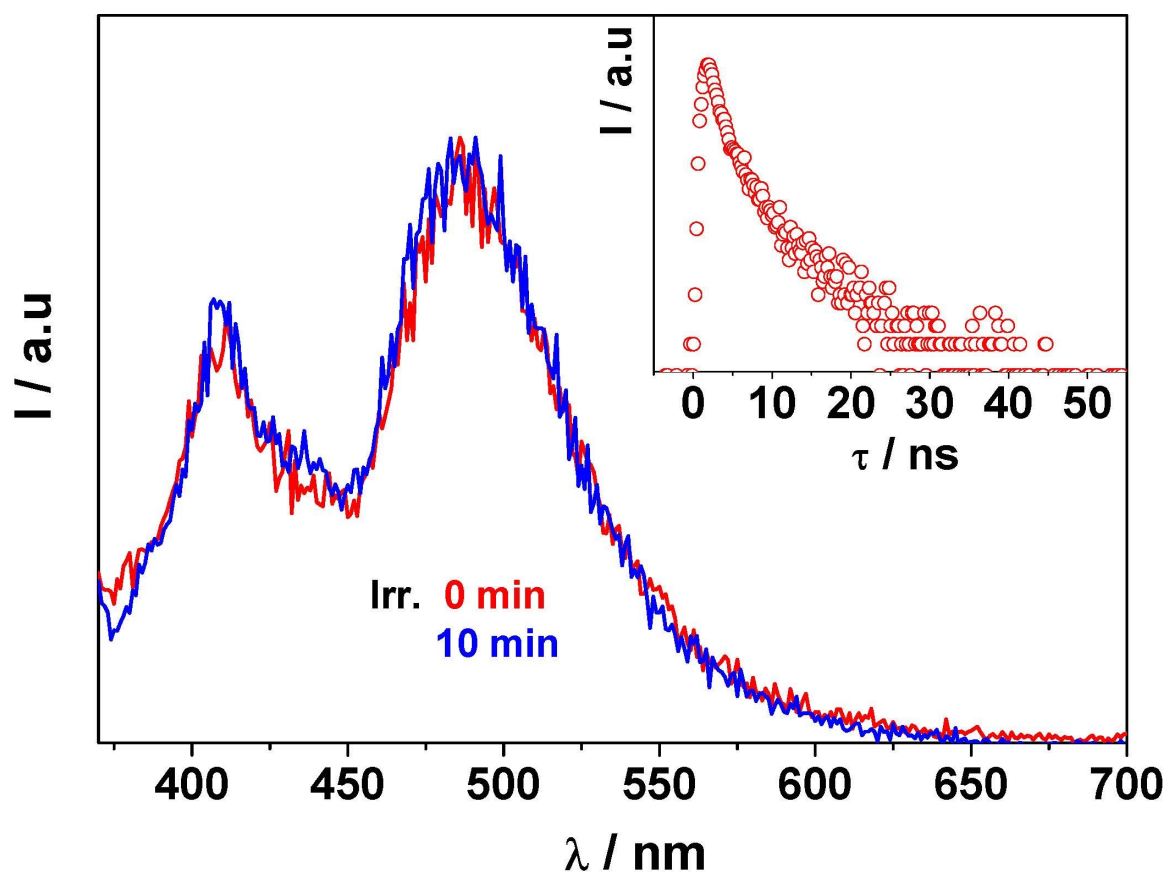

**Fig. ESI9-b.** Emission profiles (main window) and corresponding lifetime decay (Inset at  $t = 0$ ) of (E)-1c in DMSO at room temperature after 10 min irradiation at 350 nm (red line,  $\lambda_{\text{IRR}}$ : 5 microwatt/ $\text{mm}^2$ ) and no irradiation (blue line).

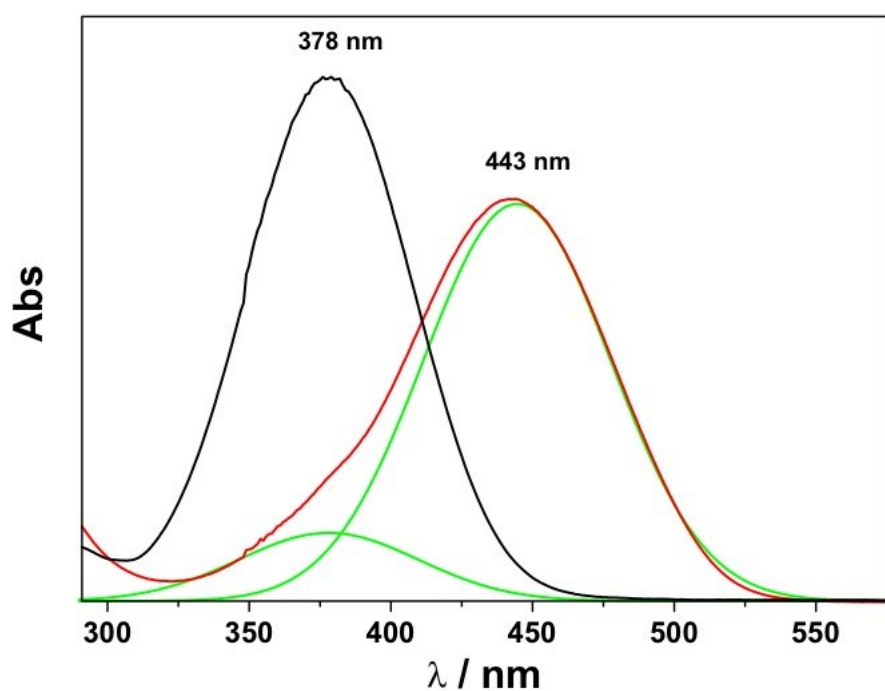



**Fig. ESI10.** Decovonluted spectra of **1a** in  $\text{CH}_2\text{Cl}_2$ . (Initial profile = black line; final profile = redline).

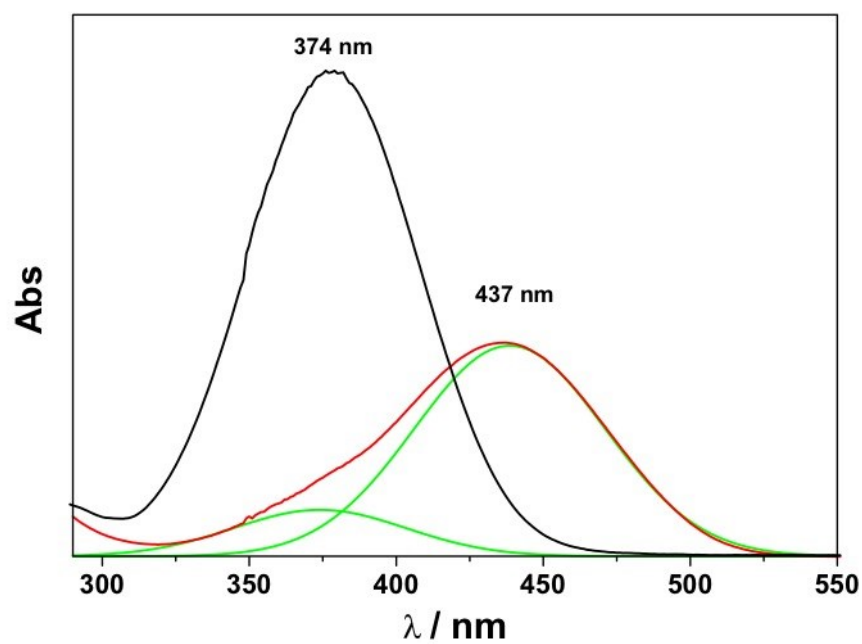

**Fig. ESI11.** Decovonluted spectra of **1b** in  $\text{CH}_2\text{Cl}_2$ . (Initial profile = black line; final profile = redline).

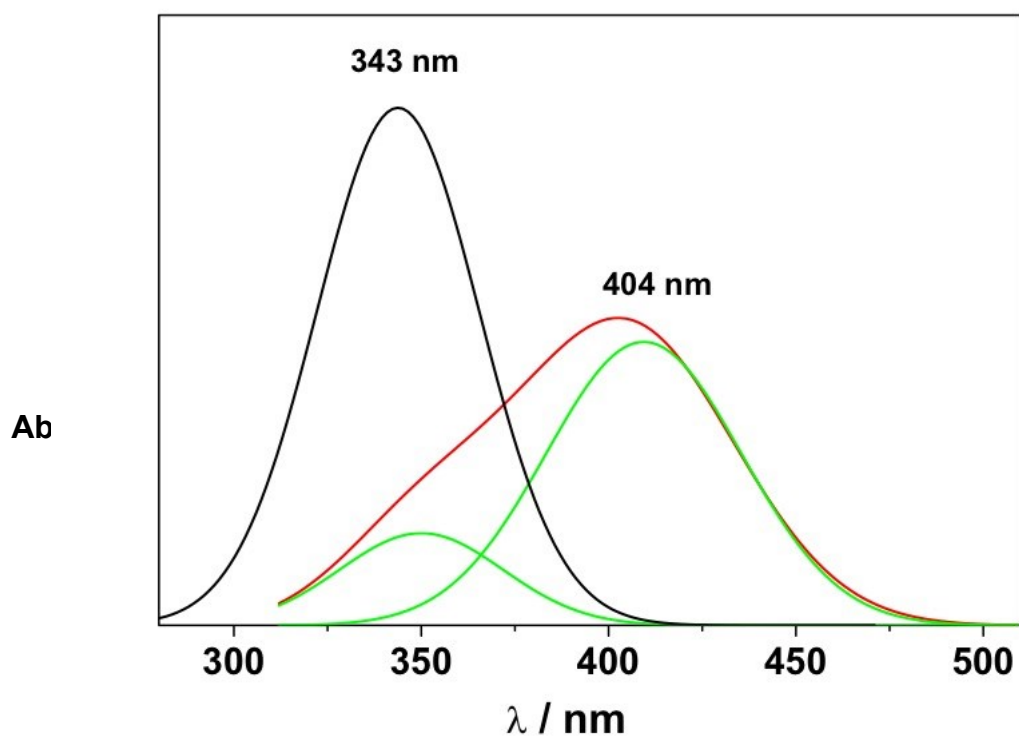

**Fig. ESI12.** Decovonluted spectra of **1c** in CH<sub>2</sub>Cl<sub>2</sub>. (Initial profile = black line; final profile = redline)

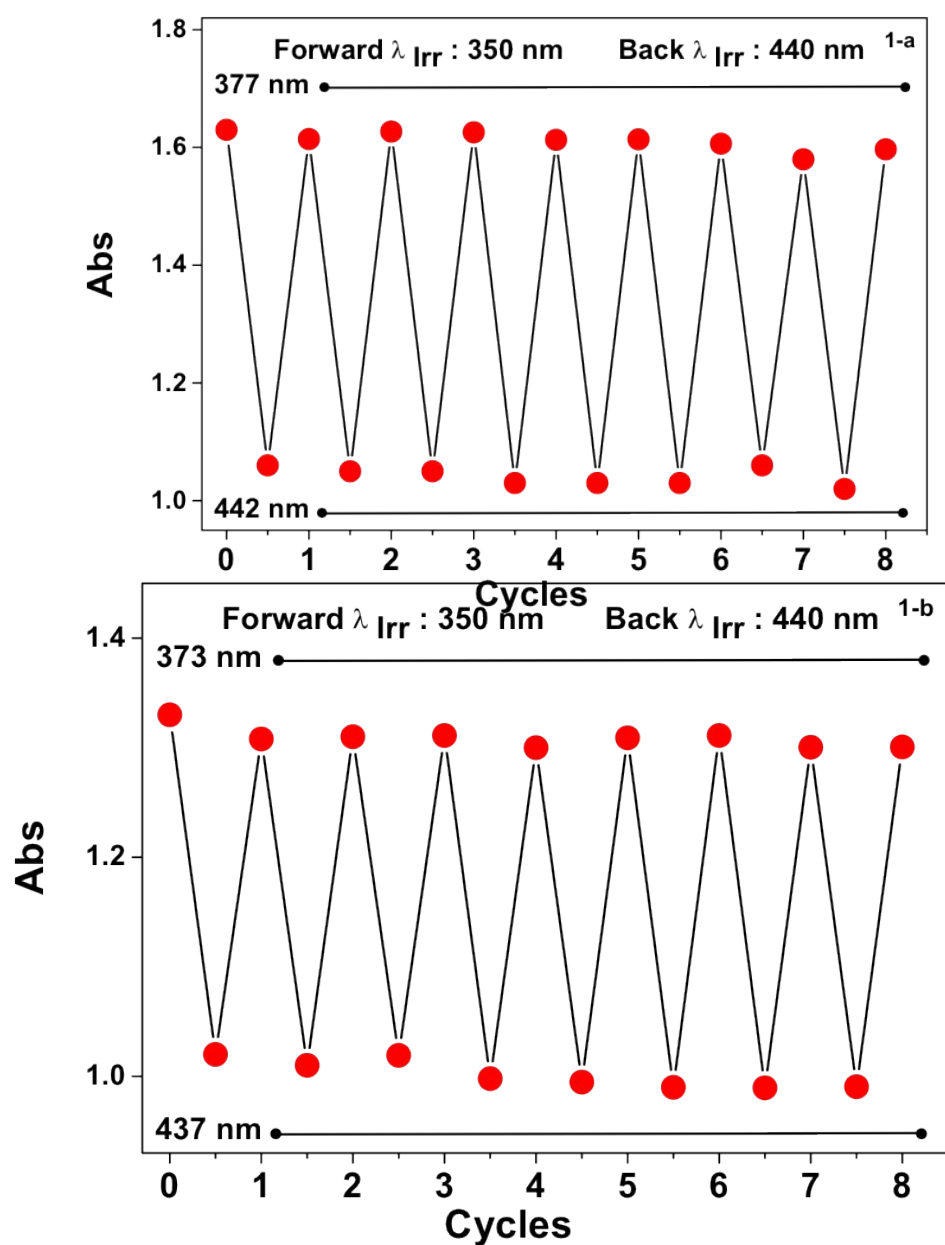

**Fig. ESI13.** Photocycling for **1a**

Fig. ESI14. Photocycling for **1b**

## 2. NMR Spectroscopy

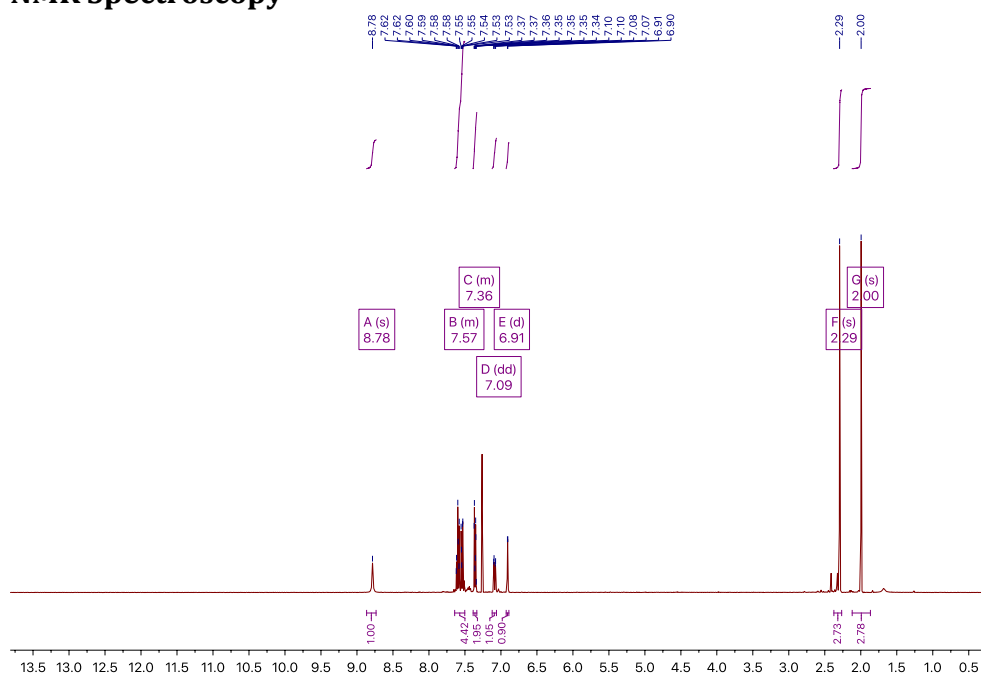

Fig. ESI15. 400 MHz <sup>1</sup>H NMR of (*E*)-**1a**.

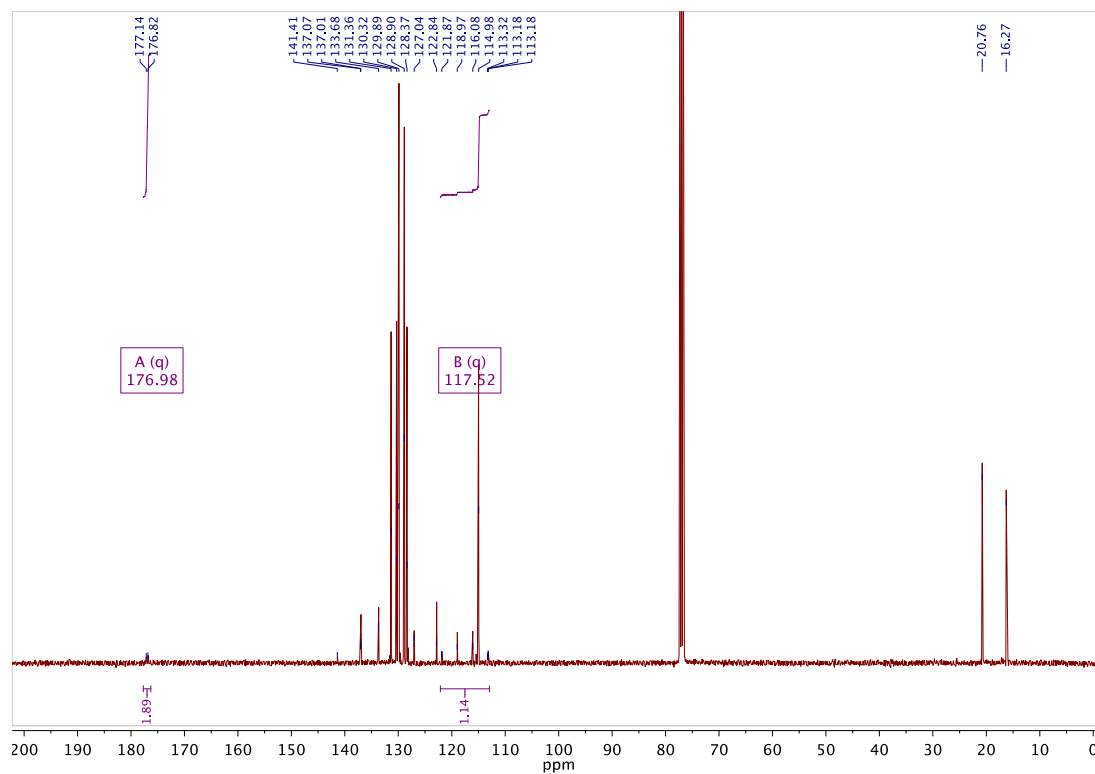

**Fig ESI16** 100.62 MHz  $^{13}\text{C}$  NMR of (*E*)-**1a**.

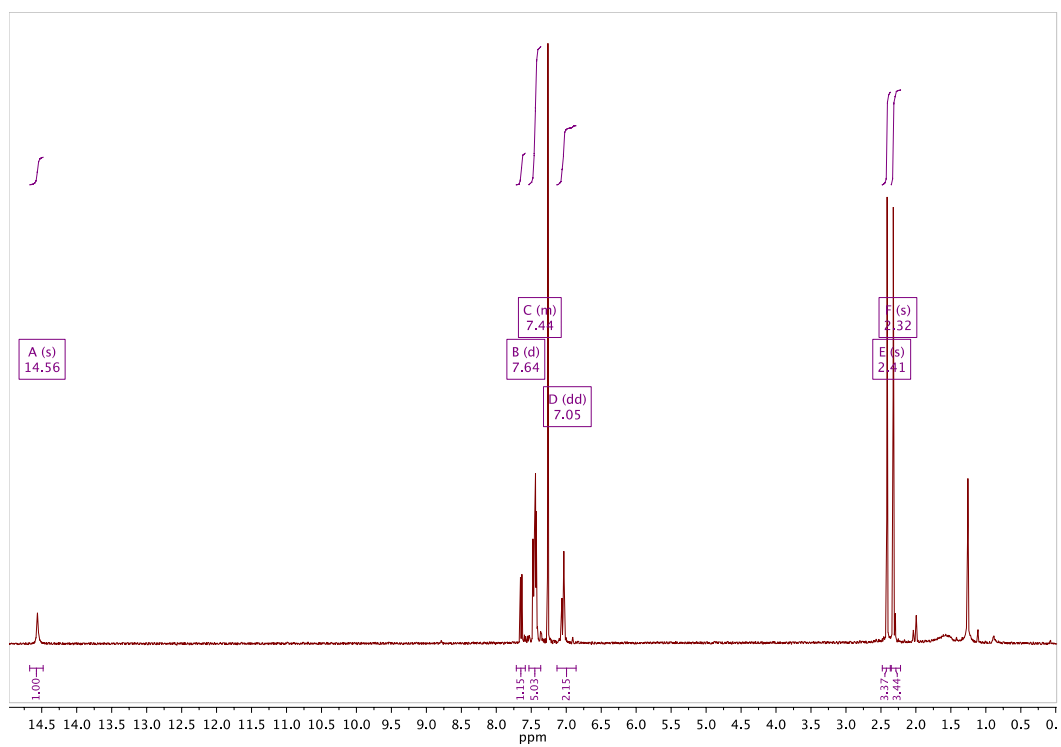

**Fig. ESI17.** 400.13 MHz  $^1\text{H}$  NMR of (*Z*)-**1a**.

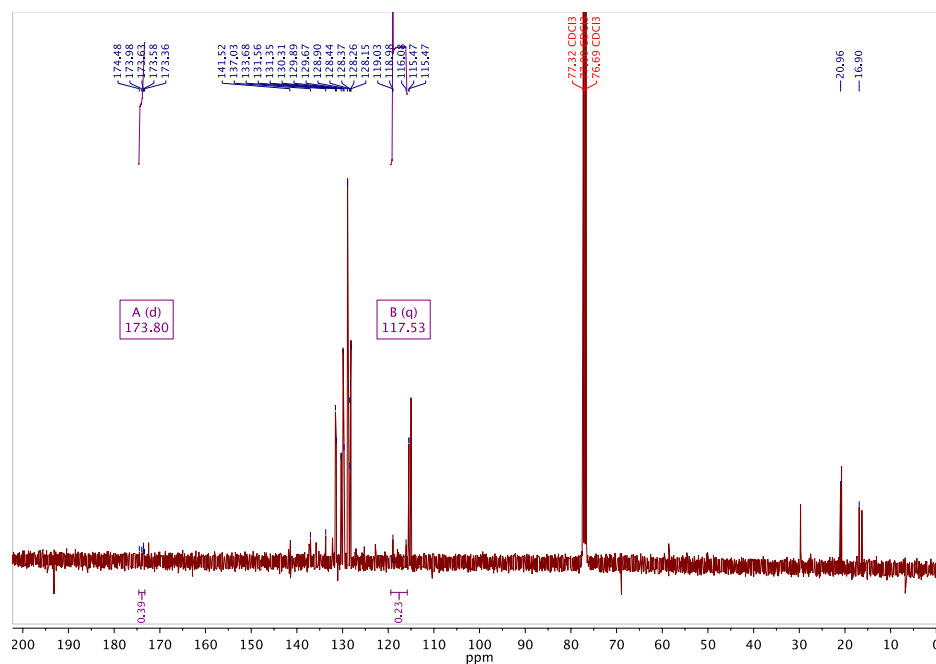

**Fig ESI18.** 100.62 MHz  $^{13}\text{C}$  NMR of (*E*)-**1a**.

new Fluorine 2,4 3,4,2,4 CF3.701.11r

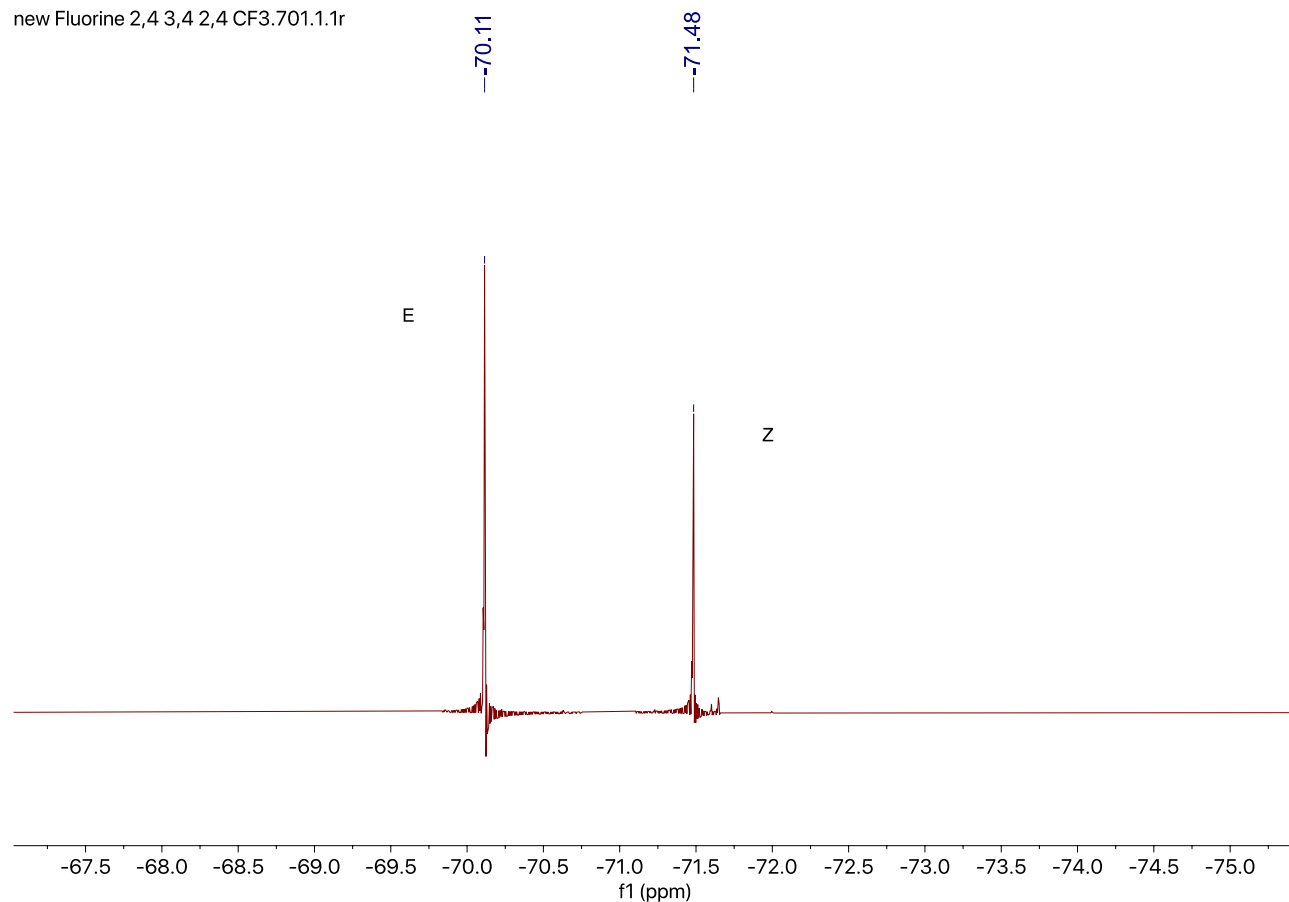

**Fig. ESI19.** 373.73 MHz  $^{19}\text{F}$  NMR of **1a** isomers.

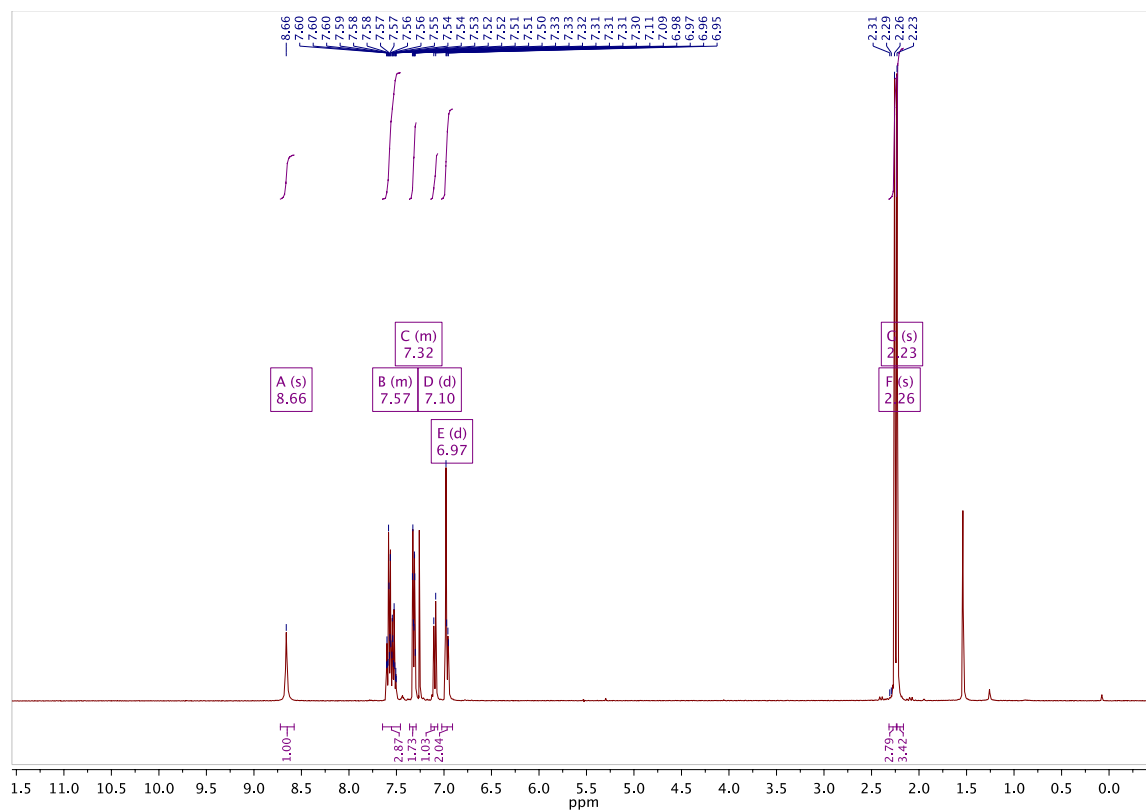

**Fig. ESI20.** 400.13 MHz  $^1\text{H}$  NMR of (*E*)-**1b**.

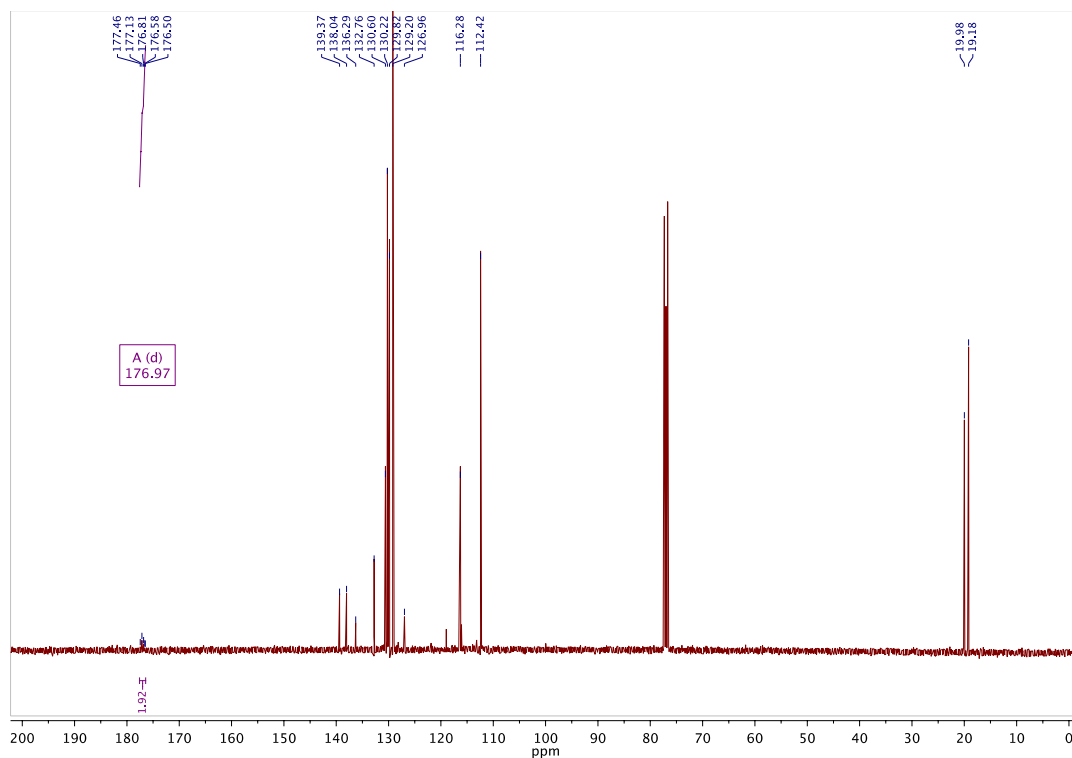

**Figure ESI21.** 100.62 MHz  $^{13}\text{C}$  NMR of (*E*)-**1b**.

3,4-hydrazine 25C.16.1.1r  
3,4-hydrazine old sample in cdcl3 70 ° 365 nm

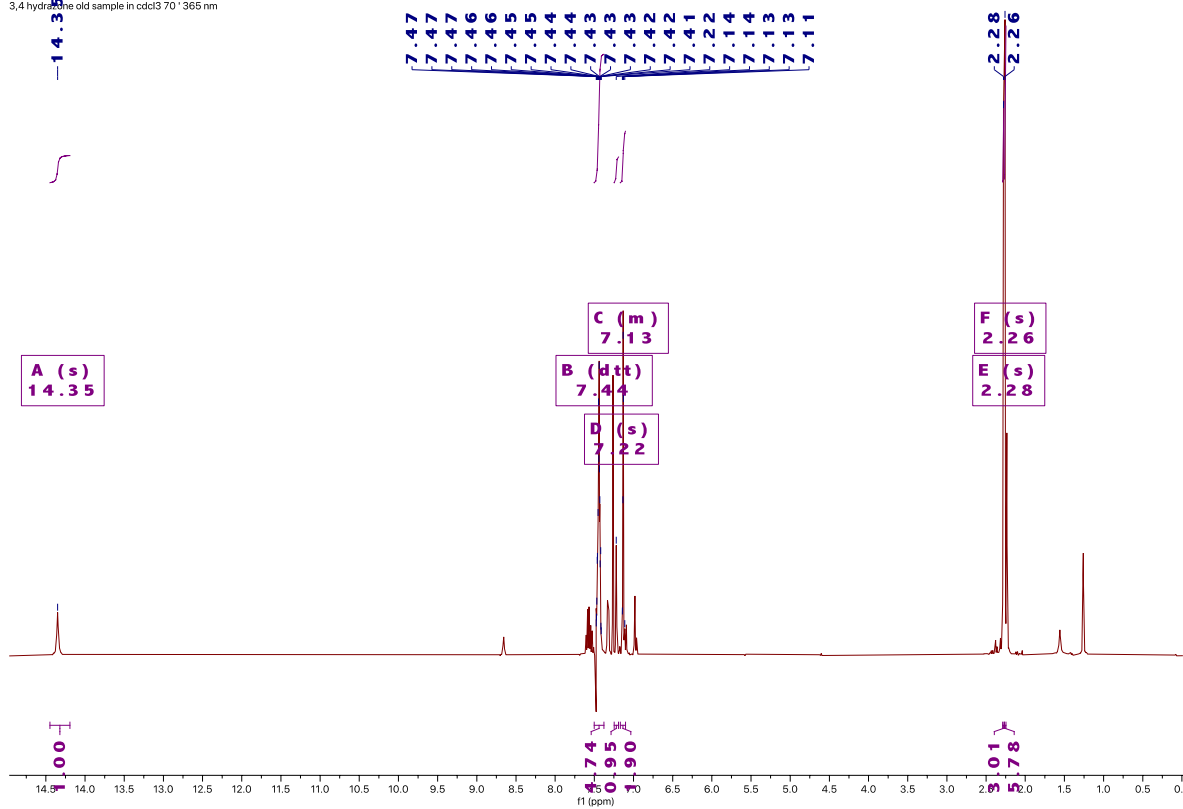

Fig. ESI22. 400.13 MHz <sup>1</sup>H NMR of (Z) -1b.

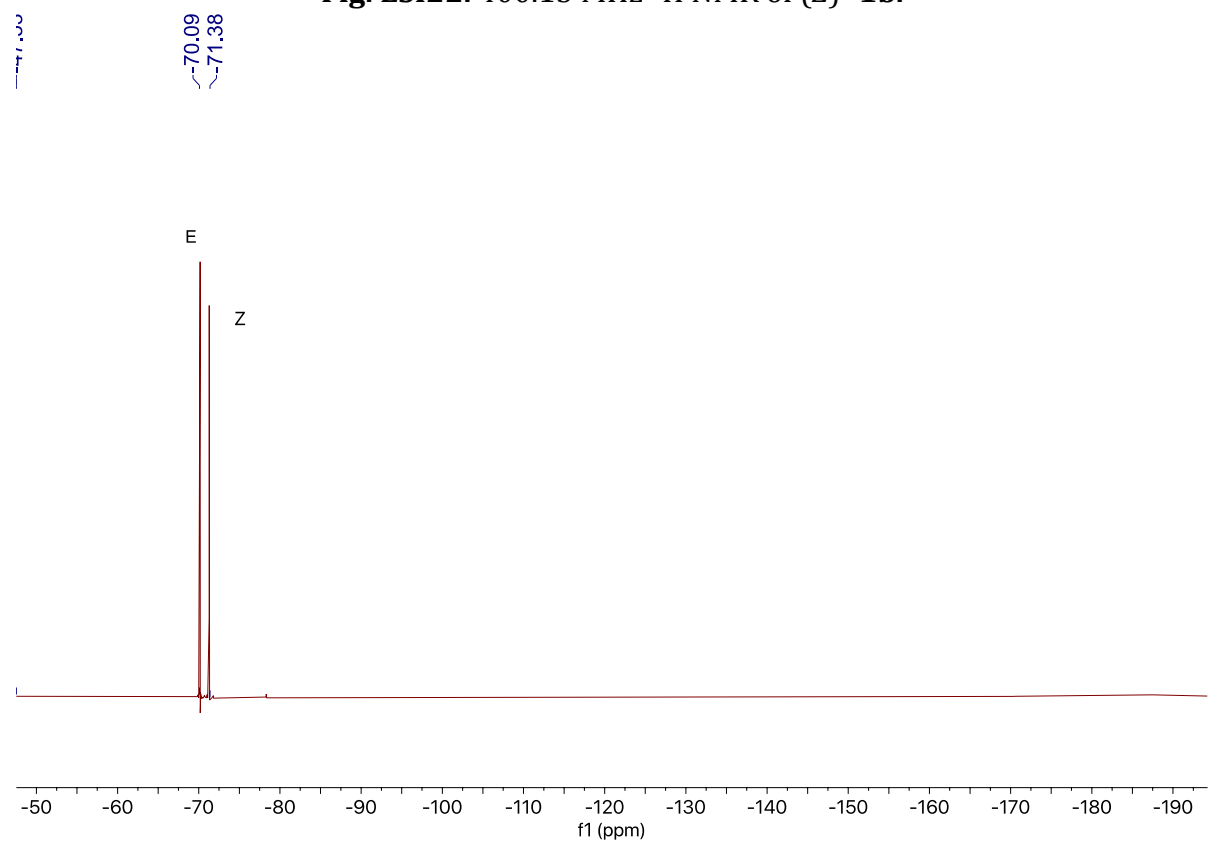

Fig. ESI23. 373.43 MHz <sup>19</sup>F NMR of 1b.

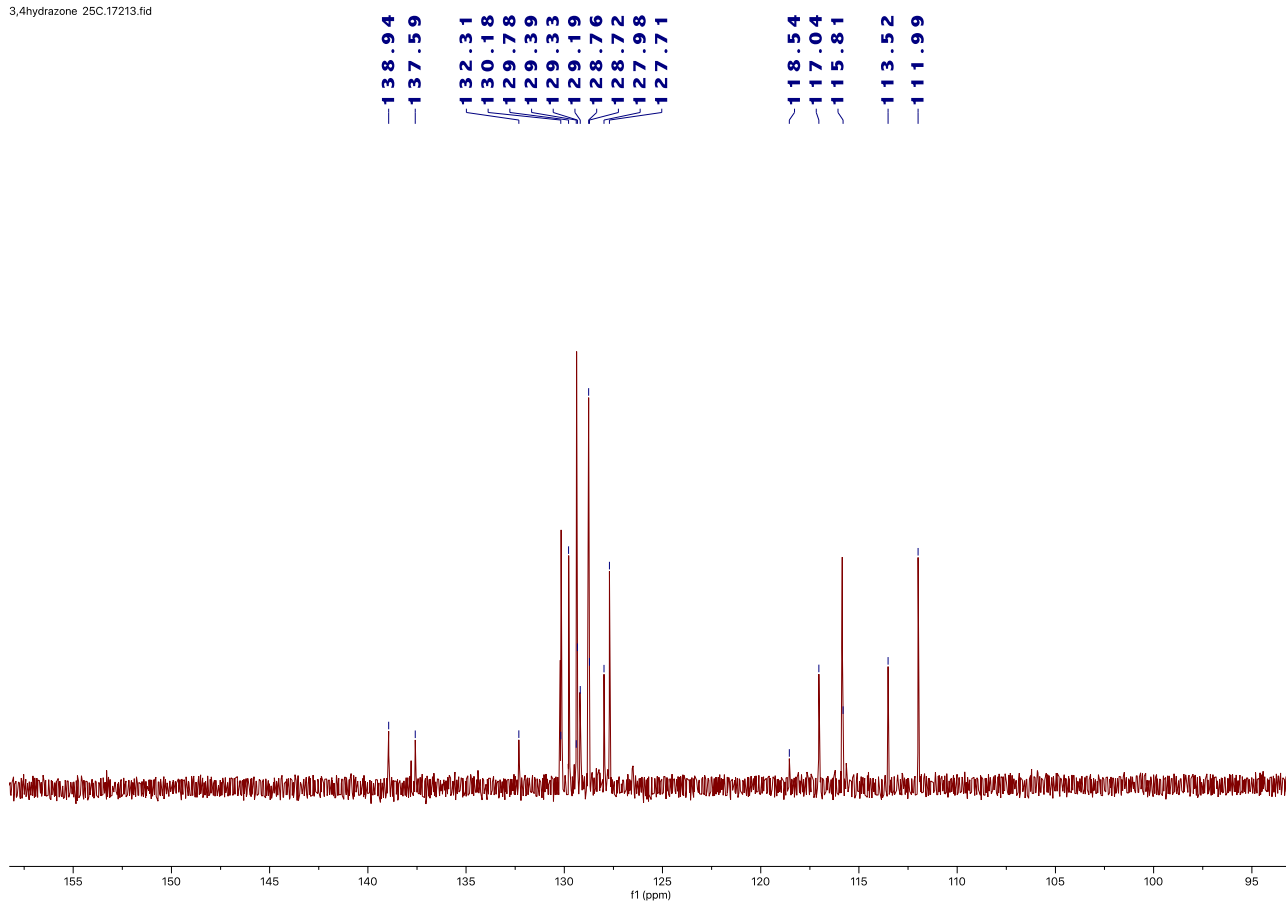

**Fig. ESI24.** 100.62 MHz <sup>13</sup>C NMR of **(Z)-1b**.



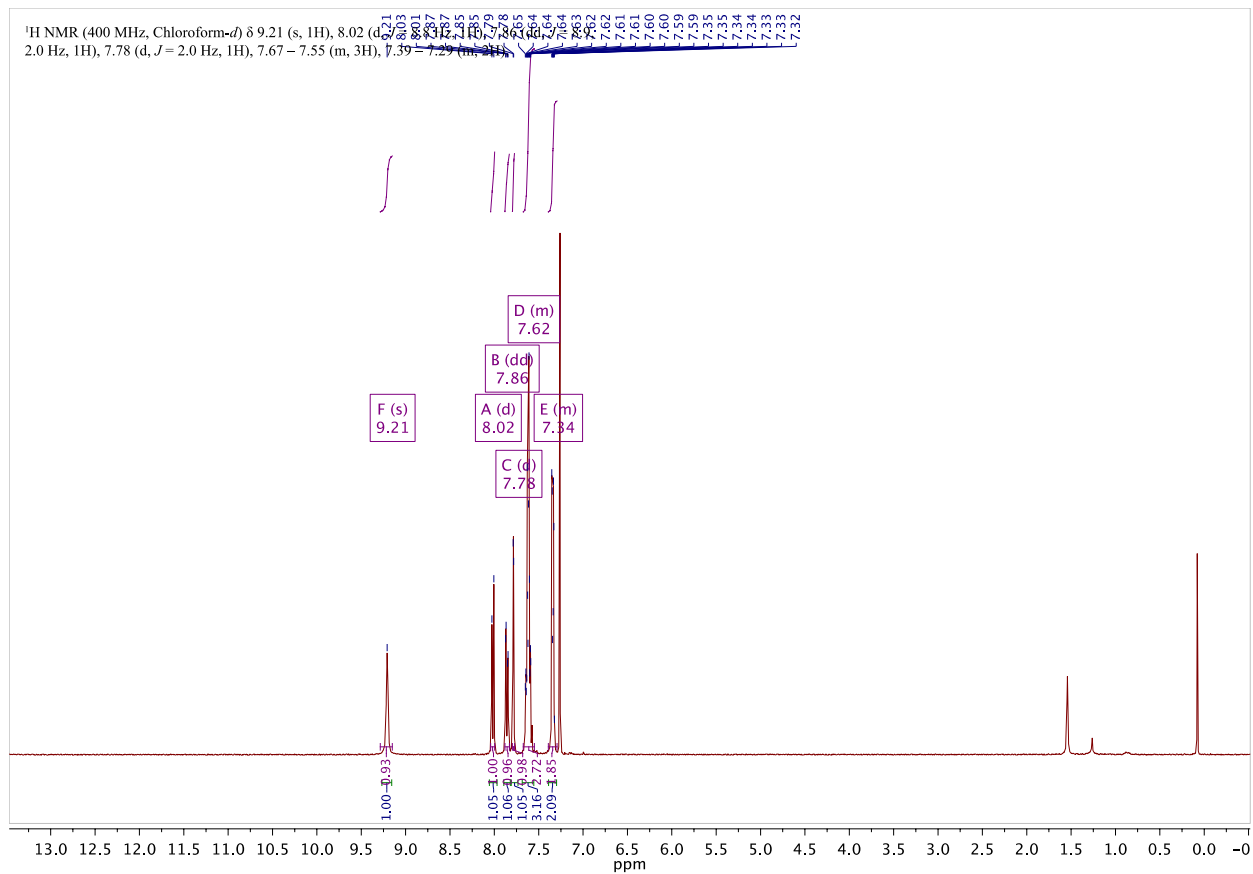

**E**

**Fig. ESI25.** 400.13 MHz <sup>1</sup>H NMR of **1c**.

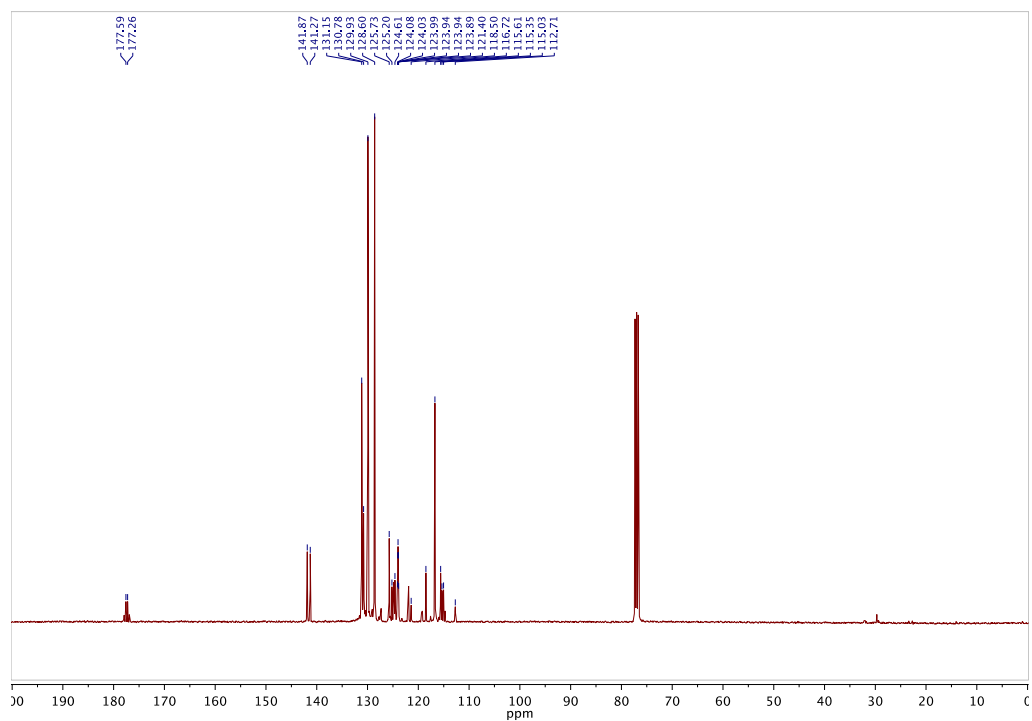

Fig ES126. 100.62 MHz  $^{13}\text{C}$  NMR of (*E*)-1c

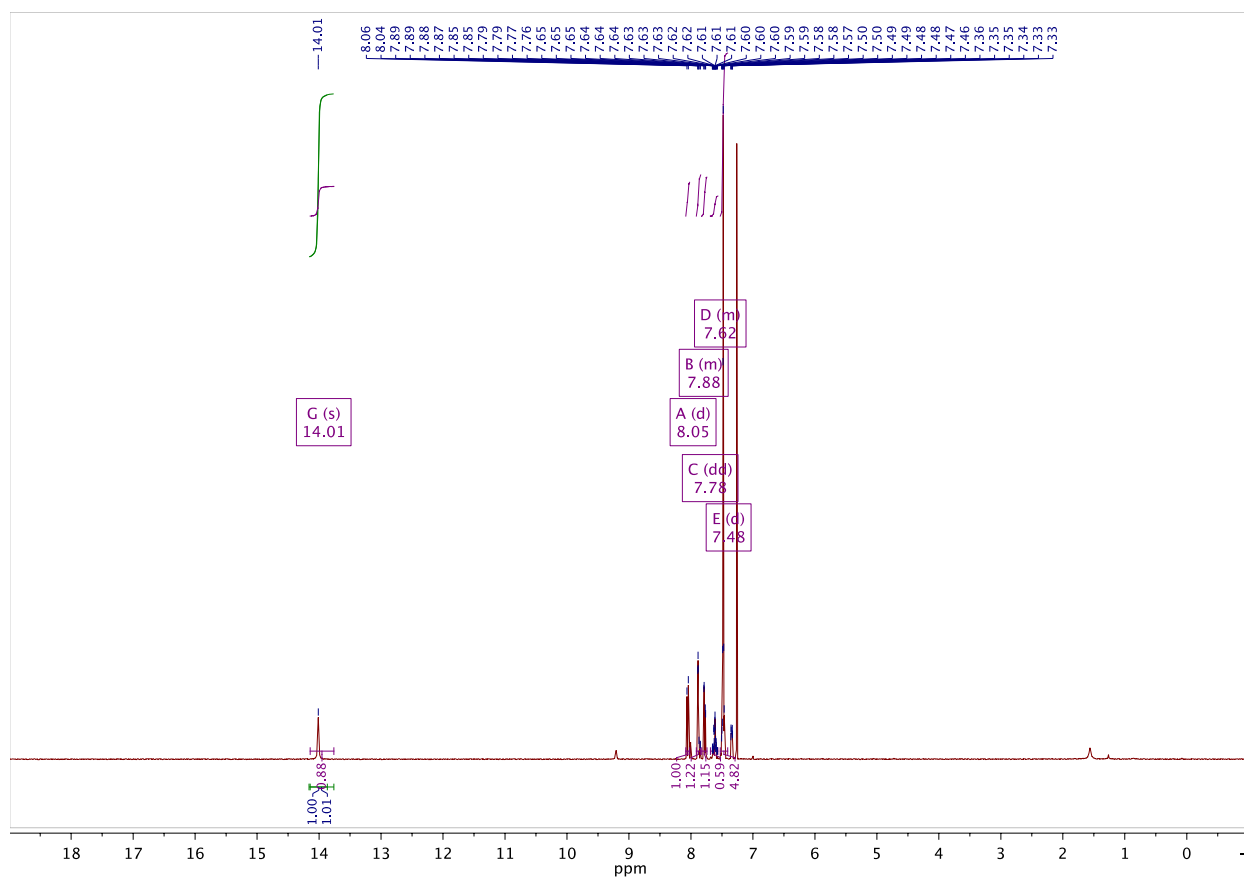

Fig. ES127.  
400.13 MHz  
 $^1\text{H}$  NMR of  
(*Z*)-1c.

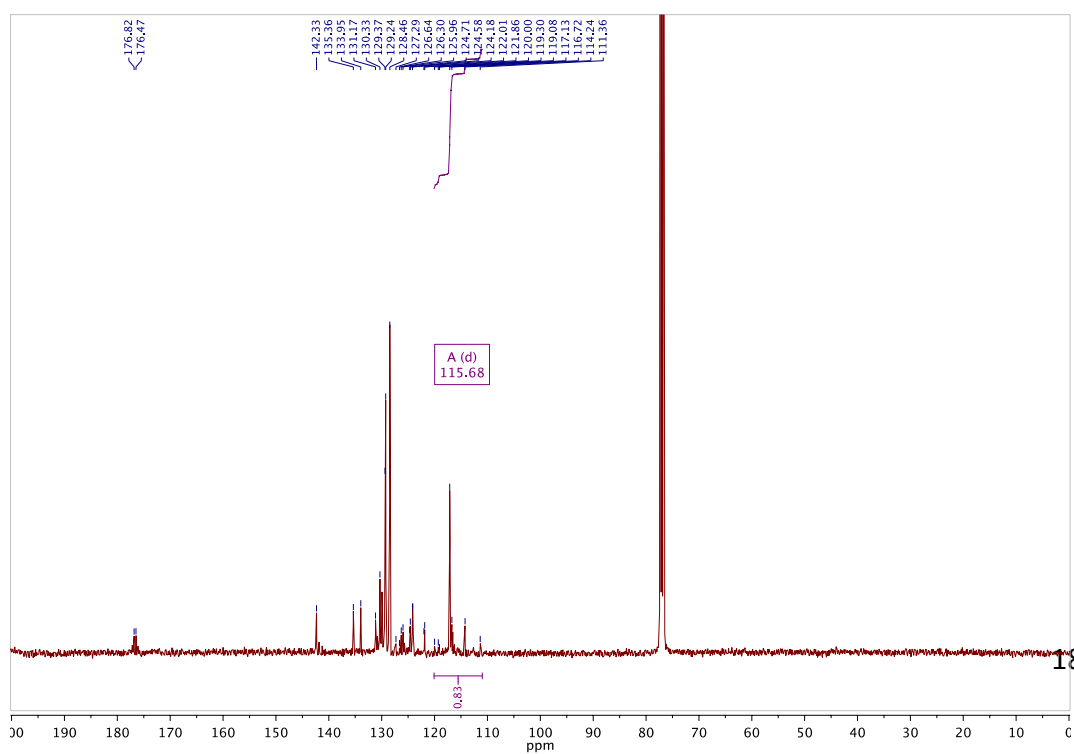

**Fig. ESI28.** 100.62 MHz  $^{13}\text{C}$  NMR of (*Z*)-**1c**.

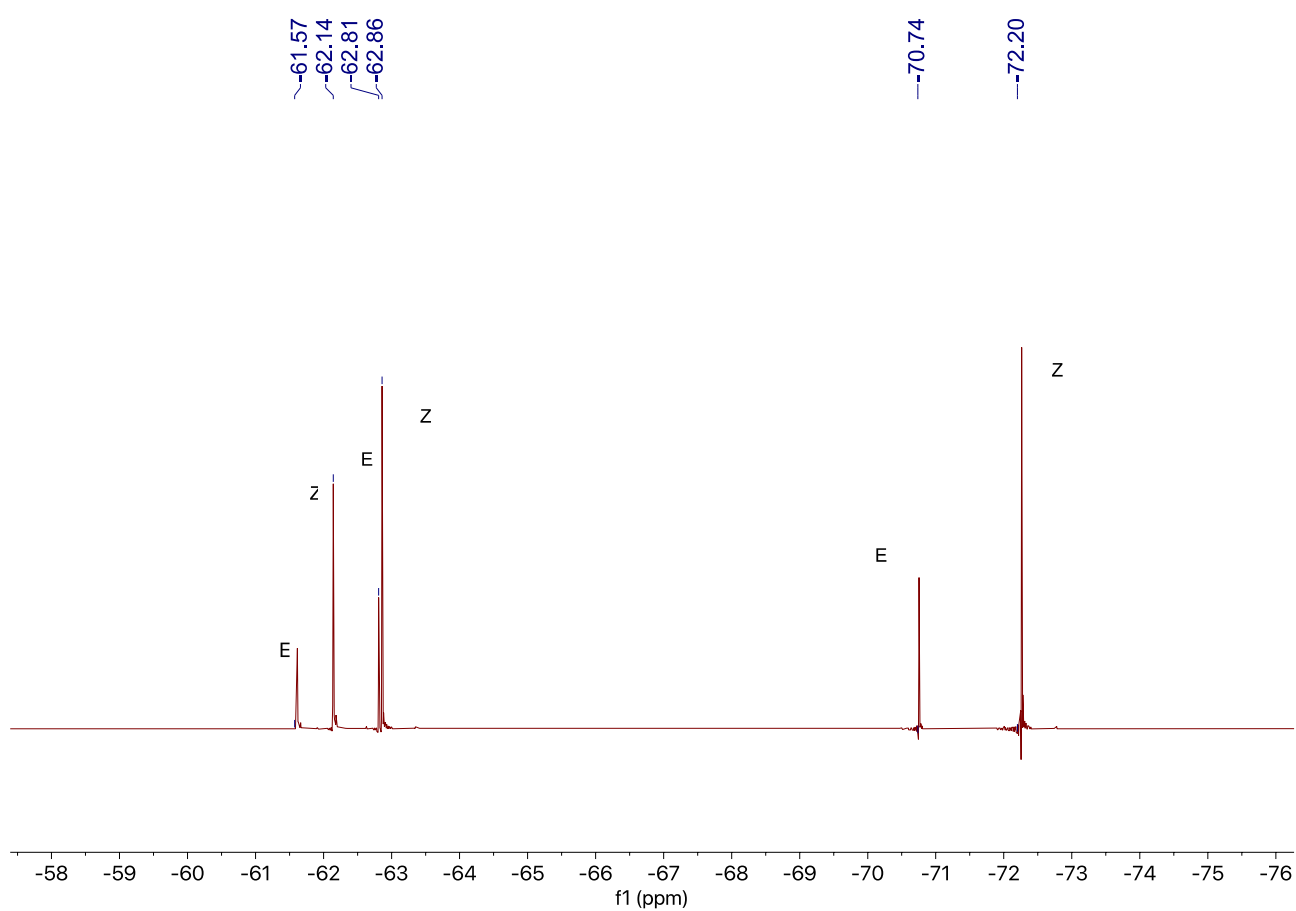

**Fig. ESI29.** 373.73 MHz  $^{19}\text{F}$  NMR of (*E*)-**1c** and (*Z*)-**1c**.

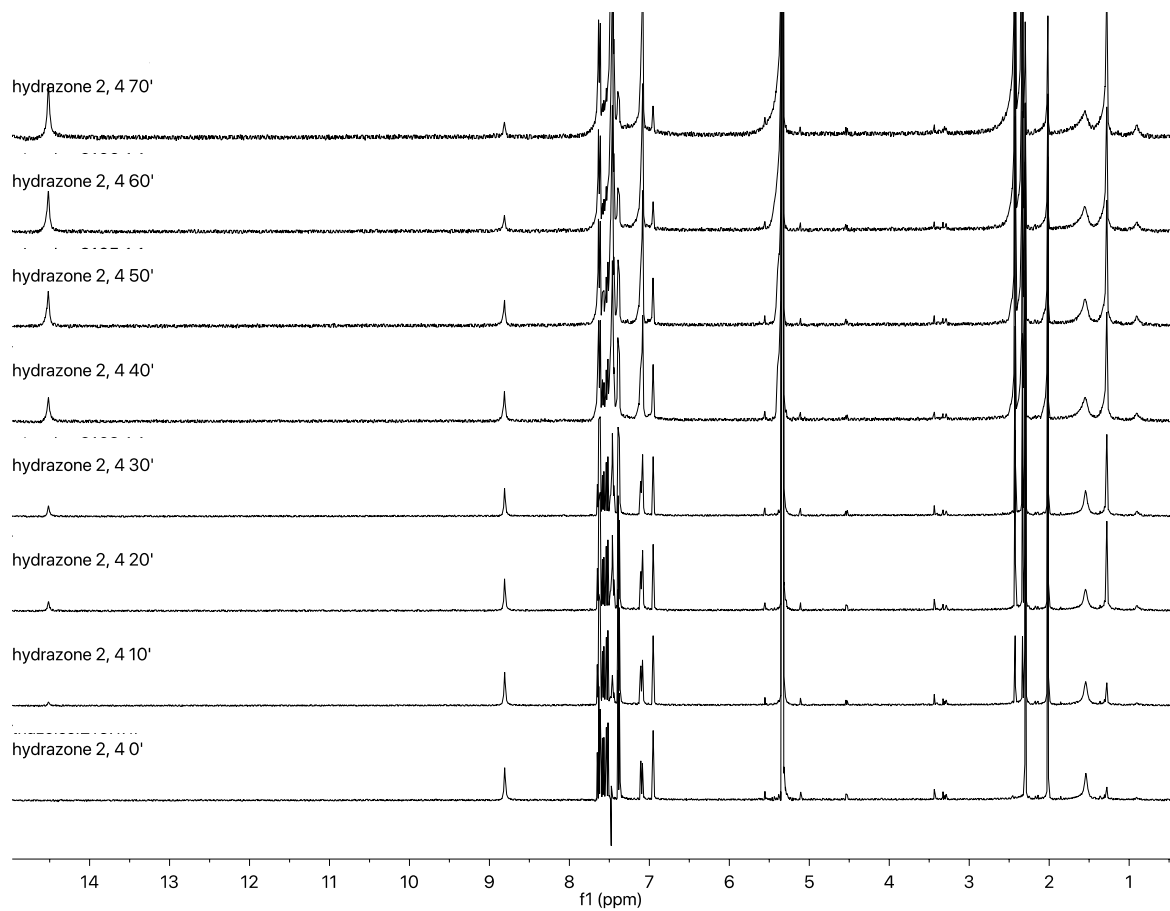

**Fig. ESI30.** NMR spectra in 1,1,2,2-tetrachloroethane-d<sub>2</sub> of (*E*)-**1a** irradiated at 365 nm time 0-70 min.

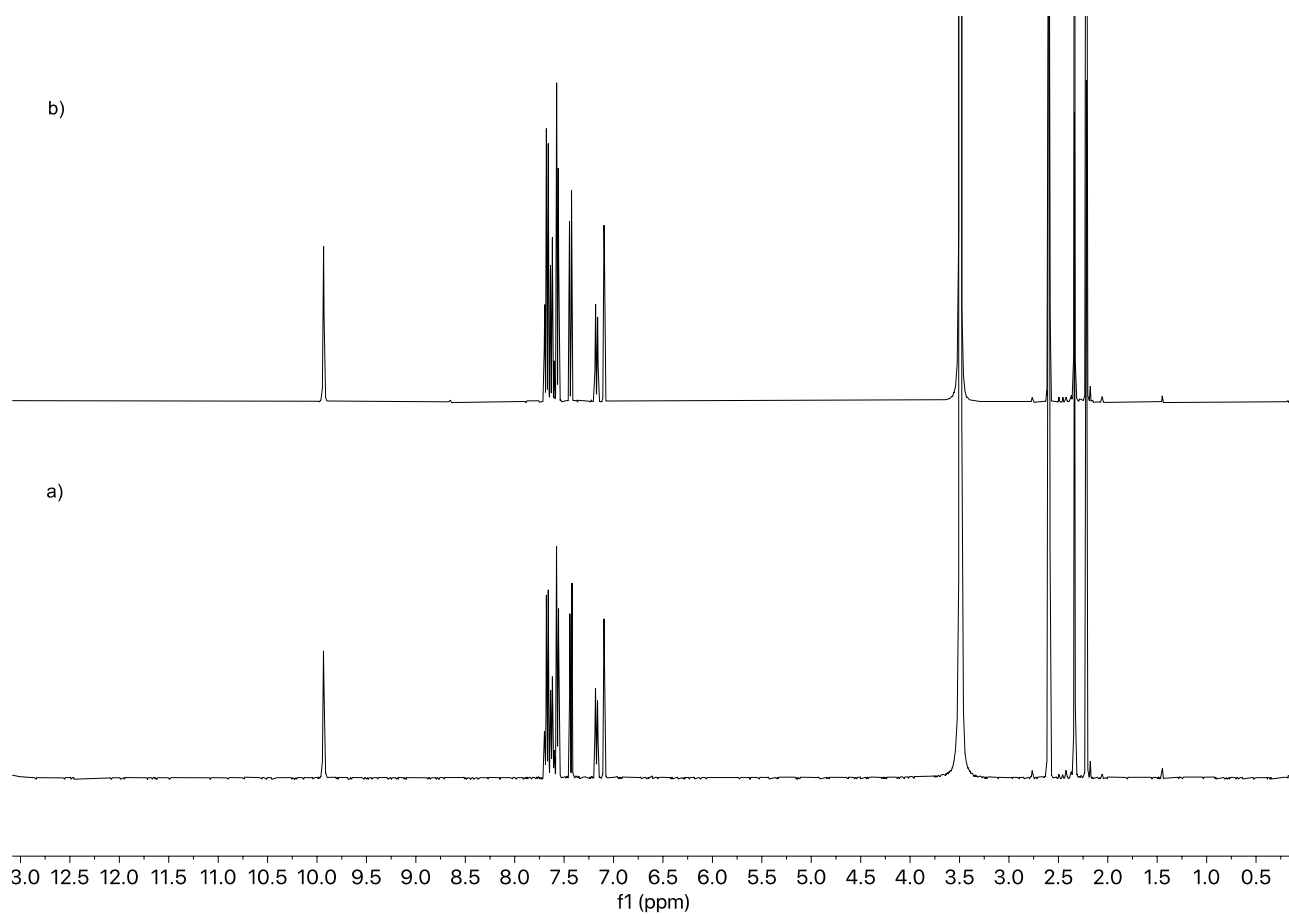

**Fig. ESI31.** NMR spectra in DMSO-d<sub>6</sub> of (*E*)-**1a** **a)** non irradiated **b)** irradiated at 365 nm 30 min.

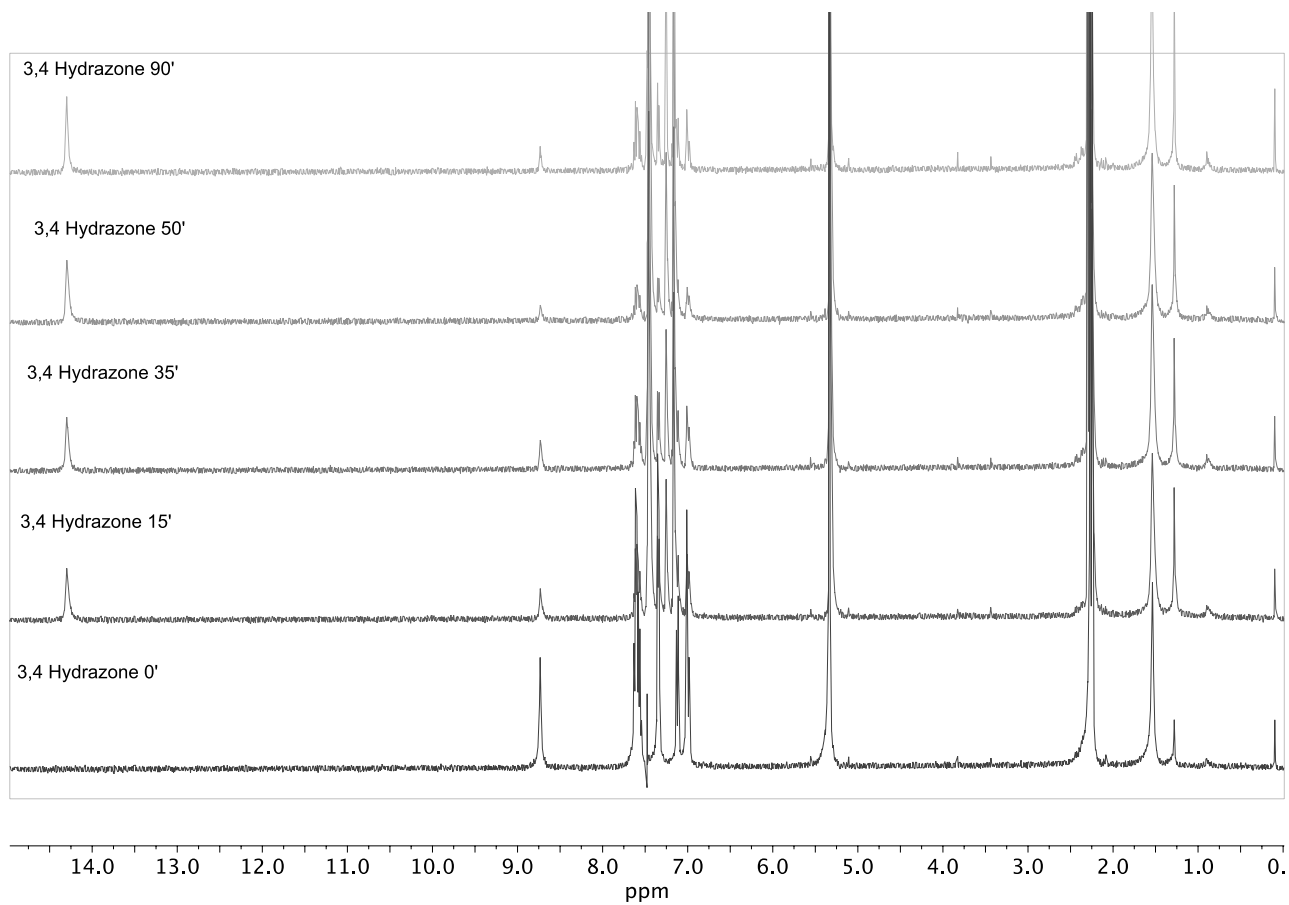

**Fig. ESI32.** NMR spectra in 1,1,2,2-tetrachloroethane-d<sub>2</sub> of (*E*)-**1b** irradiated at 365 nm time 0-90 min.

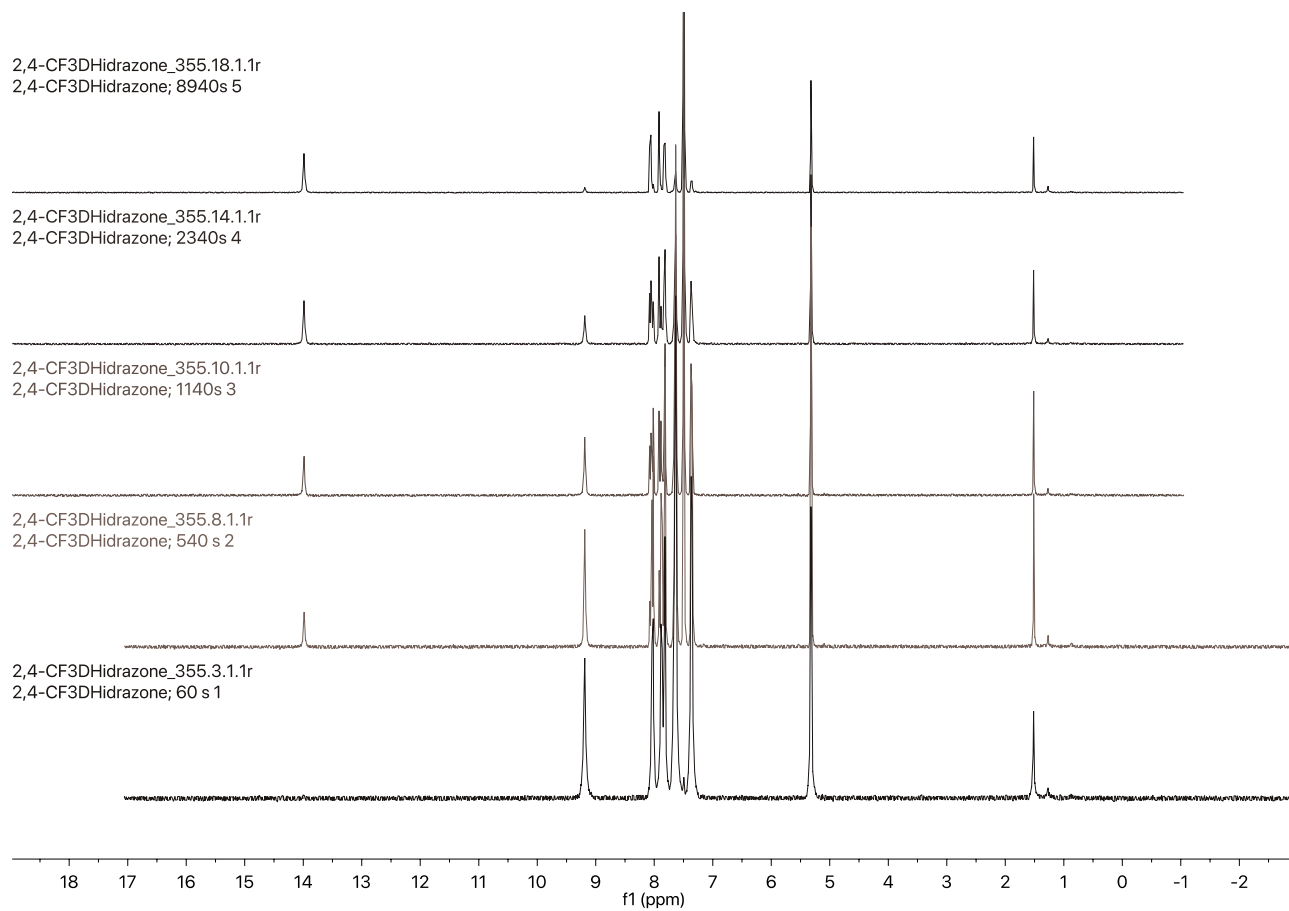

**Fig. ESI33.** NMR spectra in 1,1,2,2-tetrachloroethane-d<sub>2</sub> of (*E*)-**1c** irradiated at 365 nm time 0-70 min.

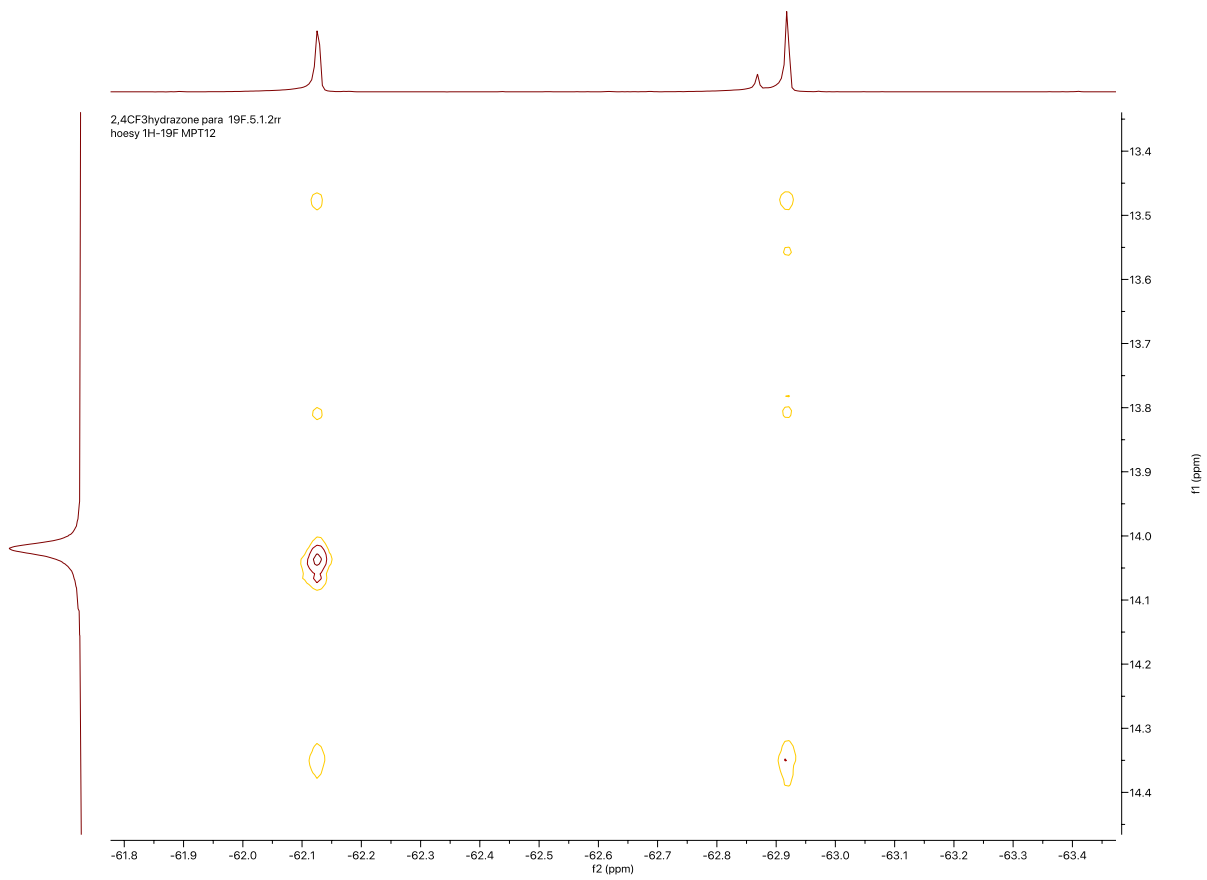

**Fig. ESI34.**  $^{19}\text{F}$ - $^1\text{H}$  HOESY experiment ( $d_8=550$  ms) (*Z*)-**1c**.



### 3. X-Ray Analysis

#### (E)-1a

##### Crystal structure determination of E-1a

The asymmetric unit contains two crystallographically independent but chemically equivalent molecules, there are eight molecules in the unit cell.

The non-chiral molecule has crystallised in a chiral space group (this sometimes happens, there will be equal numbers of left and right handed crystals). The crystal chosen also had racemic twinning (there is a small twin component of the opposite handedness). The ratio of the two possible chiral domains in the crystal measured refined to 0.84:0.16 using the TWIN and BASF commands in Shelxl.

The NHs were located in a difference map but placed at a calculated position for the refinement.

##### Experimental

Single crystals of C<sub>17</sub>H<sub>15</sub>F<sub>3</sub>N<sub>2</sub>O were grown from methanol. A suitable crystal was selected and mounted on a glass fibre with Fomblin oil and placed on a Rigaku Oxford Diffraction SuperNova diffractometer with a dual source (Cu at zero) equipped with an AtlasS2 CCD area detector. The crystal was kept at 150(2) K during data collection. Using Olex2 [1], the structure was solved with the ShelXT [2] structure solution program using Intrinsic Phasing and refined with the ShelXL [3] refinement package using Least Squares minimisation.

Crystal Data for C<sub>17</sub>H<sub>15</sub>F<sub>3</sub>N<sub>2</sub>O (M = 320.31 g/mol): orthorhombic, space group P2<sub>1</sub>2<sub>1</sub>2<sub>1</sub> (no. 19), a = 8.14933(8) Å, b = 10.51816(9) Å, c = 36.3202(3) Å, V = 3113.22(5) Å<sup>3</sup>, Z = 8, T = 150(2) K, μ(CuKα) = 0.946 mm<sup>-1</sup>, D<sub>calc</sub> = 1.367 g/cm<sup>3</sup>, 30520 reflections measured (8.752° ≤ 2θ ≤ 147.298°), 6180 unique (R<sub>int</sub> = 0.0225, R<sub>sigma</sub> = 0.0153) which were used in all calculations. The final R<sub>1</sub> was 0.0267 (I > 2σ(I)) and wR<sub>2</sub> was 0.0697 (all data).

**Table 1 Crystal data and structure refinement for af9.**

|                                    |                                                                 |
|------------------------------------|-----------------------------------------------------------------|
| Identification code                | af9                                                             |
| Empirical formula                  | C <sub>17</sub> H <sub>15</sub> F <sub>3</sub> N <sub>2</sub> O |
| Formula weight                     | 320.31                                                          |
| Temperature/K                      | 150(2)                                                          |
| Crystal system                     | orthorhombic                                                    |
| Space group                        | P2 <sub>1</sub> 2 <sub>1</sub> 2 <sub>1</sub>                   |
| a/Å                                | 8.14933(8)                                                      |
| b/Å                                | 10.51816(9)                                                     |
| c/Å                                | 36.3202(3)                                                      |
| α/°                                | 90                                                              |
| β/°                                | 90                                                              |
| γ/°                                | 90                                                              |
| Volume/Å <sup>3</sup>              | 3113.22(5)                                                      |
| Z                                  | 8                                                               |
| ρ <sub>calc</sub> /cm <sup>3</sup> | 1.367                                                           |

|                                                |                                                               |
|------------------------------------------------|---------------------------------------------------------------|
| $\mu/\text{mm}^{-1}$                           | 0.946                                                         |
| F(000)                                         | 1328.0                                                        |
| Crystal size/ $\text{mm}^3$                    | $0.2 \times 0.16 \times 0.08$ yellow block                    |
| Radiation                                      | $\text{CuK}\alpha$ ( $\lambda = 1.54184$ )                    |
| $2\Theta$ range for data collection/ $^\circ$  | 8.752 to 147.298                                              |
| Index ranges                                   | $-10 \leq h \leq 9, -13 \leq k \leq 13, -43 \leq l \leq 44$   |
| Reflections collected                          | 30520                                                         |
| Independent reflections                        | 6180 [ $R_{\text{int}} = 0.0225, R_{\text{sigma}} = 0.0153$ ] |
| Data/restraints/parameters                     | 6180/0/420                                                    |
| Goodness-of-fit on $F^2$                       | 1.055                                                         |
| Final R indexes [ $I \geq 2\sigma(I)$ ]        | $R_1 = 0.0267, wR_2 = 0.0688$                                 |
| Final R indexes [all data]                     | $R_1 = 0.0278, wR_2 = 0.0697$                                 |
| Largest diff. peak/hole / $e \text{ \AA}^{-3}$ | 0.15/-0.20                                                    |
| Flack parameter                                | 0.16(10)                                                      |

**Table 2 Fractional Atomic Coordinates ( $\times 10^4$ ) and Equivalent Isotropic Displacement Parameters ( $\text{\AA}^2 \times 10^3$ ) for af9.  $U_{\text{eq}}$  is defined as 1/3 of the trace of the orthogonalised  $U_{\text{ij}}$  tensor.**

| Atom | <i>x</i>    | <i>y</i>     | <i>z</i>   | $U(\text{eq})$ |
|------|-------------|--------------|------------|----------------|
| F1B  | 3512.5 (13) | 8721.9 (10)  | 5996.8 (3) | 34.4 (2)       |
| F1E  | 8392.9 (14) | 8599.8 (10)  | 6626.0 (3) | 37.5 (2)       |
| F1C  | 896.8 (13)  | 9012.4 (11)  | 6001.4 (3) | 39.7 (3)       |
| F1F  | 5825.5 (14) | 9051.7 (12)  | 6594.0 (3) | 45.1 (3)       |
| F1A  | 2515.3 (19) | 10478.2 (10) | 6189.1 (3) | 48.5 (3)       |
| F1D  | 7619.1 (19) | 10431.3 (10) | 6435.9 (4) | 51.8 (3)       |
| O102 | 2244.3 (18) | 9517.3 (12)  | 6834.0 (3) | 36.5 (3)       |
| O008 | 7409.5 (19) | 9524.4 (12)  | 5779.7 (4) | 41.2 (3)       |
| N104 | 1911.5 (17) | 6731.8 (13)  | 6337.1 (4) | 25.5 (3)       |
| N204 | 6661.0 (18) | 6698.9 (13)  | 6240.6 (4) | 27.5 (3)       |
| N105 | 1698.4 (19) | 5490.0 (13)  | 6332.5 (4) | 27.9 (3)       |
| N205 | 6329 (2)    | 5471.7 (13)  | 6196.0 (4) | 29.1 (3)       |
| C206 | 5677 (2)    | 4748.7 (15)  | 6487.6 (4) | 25.9 (3)       |
| C207 | 5236 (2)    | 3486.2 (15)  | 6414.9 (5) | 27.0 (3)       |
| C203 | 6995 (2)    | 7378.1 (16)  | 5950.5 (4) | 26.4 (3)       |
| C102 | 2147 (2)    | 8735.2 (16)  | 6592.3 (5) | 26.5 (3)       |
| C212 | 7023 (2)    | 6877.4 (16)  | 5567.1 (4) | 26.6 (3)       |
| C101 | 2278 (2)    | 9227.9 (16)  | 6189.2 (5) | 29.7 (4)       |
| C103 | 1851 (2)    | 7374.3 (15)  | 6644.9 (4) | 24.9 (3)       |
| C112 | 1465 (2)    | 6869.1 (15)  | 7016.0 (5) | 26.9 (3)       |
| C106 | 1781 (2)    | 4834.6 (16)  | 5993.6 (5) | 27.1 (3)       |
| C211 | 5447 (2)    | 5277.8 (16)  | 6834.7 (5) | 29.8 (4)       |
| C107 | 1069 (2)    | 3624.4 (16)  | 5970.3 (5) | 30.5 (4)       |
| C202 | 7233 (2)    | 8733.8 (16)  | 6018.7 (5) | 30.0 (4)       |
| C113 | 2366 (2)    | 7247.1 (18)  | 7324.4 (5) | 33.0 (4)       |
| C210 | 4709 (2)    | 4561.9 (17)  | 7109.3 (5) | 32.6 (4)       |

|      |          |             |            |          |
|------|----------|-------------|------------|----------|
| C201 | 7264 (2) | 9198.0 (17) | 6424.0 (5) | 32.4 (4) |
| C213 | 8095 (2) | 5895.3 (17) | 5476.6 (5) | 32.5 (4) |
| C117 | 161 (2)  | 6019.5 (17) | 7062.5 (5) | 31.2 (4) |
| C217 | 5949 (3) | 7335.5 (18) | 5301.1 (5) | 35.3 (4) |
| C209 | 4199 (2) | 3321.2 (17) | 7042.4 (5) | 32.6 (4) |
| C208 | 4491 (2) | 2804.0 (16) | 6697.2 (5) | 31.6 (4) |
| C111 | 2491 (2) | 5402.4 (17) | 5688.0 (5) | 31.4 (4) |
| C108 | 1093 (2) | 3023.0 (17) | 5628.8 (5) | 35.2 (4) |
| C110 | 2480 (3) | 4777.3 (18) | 5352.6 (5) | 35.6 (4) |
| C114 | 1991 (3) | 6761 (2)    | 7668.9 (5) | 41.2 (4) |
| C116 | -191 (3) | 5520.7 (19) | 7407.0 (5) | 38.0 (4) |
| C109 | 1774 (3) | 3583.1 (18) | 5316.2 (5) | 37.5 (4) |
| C214 | 8063 (3) | 5360.7 (19) | 5128.1 (5) | 38.4 (4) |
| C27A | 5524 (2) | 2896.9 (16) | 6040.8 (5) | 34.3 (4) |
| C216 | 5924 (3) | 6793 (2)    | 4953.9 (5) | 42.9 (5) |
| C17A | 255 (3)  | 3020.1 (18) | 6299.6 (5) | 37.5 (4) |
| C215 | 6963 (3) | 5795 (2)    | 4869.2 (5) | 42.3 (5) |
| C115 | 731 (3)  | 5892 (2)    | 7709.5 (5) | 42.6 (5) |
| C29A | 3312 (3) | 2575 (2)    | 7336.4 (6) | 46.4 (5) |
| C19A | 1715 (3) | 2933 (2)    | 4944.8 (6) | 51.6 (6) |

**Table 3 Anisotropic Displacement Parameters ( $\text{\AA}^2 \times 10^3$ ) for af9. The Anisotropic displacement factor exponent takes the form:  $-2\pi^2[h^2a^2U_{11}+2hka*b*U_{12}+\dots]$ .**

| Atom | $U_{11}$ | $U_{22}$ | $U_{33}$ | $U_{23}$  | $U_{13}$  | $U_{12}$ |
|------|----------|----------|----------|-----------|-----------|----------|
| F1B  | 28.5 (5) | 45.4 (6) | 29.4 (5) | 3.1 (4)   | 6.5 (4)   | 1.4 (5)  |
| F1E  | 33.7 (6) | 39.9 (5) | 39.0 (6) | -0.8 (4)  | -9.9 (4)  | 1.0 (5)  |
| F1C  | 28.7 (5) | 55.7 (7) | 34.6 (5) | 11.0 (5)  | -1.8 (4)  | 3.0 (5)  |
| F1F  | 31.5 (6) | 58.2 (7) | 45.6 (6) | -12.4 (6) | 1.5 (5)   | 1.1 (5)  |
| F1A  | 72.3 (9) | 28.5 (5) | 44.6 (6) | 6.8 (5)   | 7.4 (6)   | -3.5 (6) |
| F1D  | 71.8 (9) | 27.3 (5) | 56.2 (7) | -3.6 (5)  | -13.1 (6) | -7.4 (6) |
| O102 | 46.0 (8) | 31.1 (6) | 32.5 (6) | -6.0 (5)  | 6.9 (6)   | -1.9 (6) |
| O008 | 47.9 (8) | 31.2 (6) | 44.4 (7) | 12.1 (6)  | -3.7 (6)  | -7.6 (6) |
| N104 | 23.4 (7) | 24.8 (6) | 28.3 (7) | 0.4 (5)   | -0.4 (5)  | 0.6 (5)  |
| N204 | 27.3 (7) | 25.7 (6) | 29.5 (7) | 2.4 (5)   | -1.7 (6)  | -2.9 (6) |
| N105 | 31.8 (8) | 25.3 (6) | 26.5 (7) | 1.5 (5)   | -0.6 (6)  | 0.2 (6)  |
| N205 | 37.9 (8) | 24.7 (6) | 24.7 (7) | 0.1 (5)   | 1.7 (6)   | -4.9 (6) |
| C206 | 25.2 (8) | 25.6 (8) | 27.0 (8) | 4.3 (6)   | -1.3 (6)  | -0.3 (6) |
| C207 | 25.5 (8) | 24.0 (7) | 31.6 (8) | 1.8 (6)   | -4.8 (7)  | 2.2 (6)  |
| C203 | 22.4 (8) | 27.8 (8) | 29.0 (8) | 3.6 (6)   | -0.5 (6)  | -0.9 (6) |
| C102 | 23.1 (8) | 29.9 (8) | 26.7 (8) | -1.1 (6)  | 3.2 (6)   | 1.4 (6)  |
| C212 | 22.3 (8) | 28.6 (8) | 29.1 (8) | 5.8 (6)   | 1.2 (6)   | -2.8 (7) |
| C101 | 28.9 (9) | 28.8 (8) | 31.3 (8) | 2.5 (7)   | 3.2 (7)   | 0.6 (7)  |
| C103 | 21.4 (8) | 27.7 (8) | 25.6 (8) | 1.2 (6)   | 0.3 (6)   | 1.0 (6)  |
| C112 | 25.3 (8) | 27.6 (7) | 27.8 (8) | 2.7 (6)   | 2.8 (6)   | 5.2 (7)  |
| C106 | 24.0 (8) | 27.3 (7) | 30.0 (8) | -2.1 (6)  | -3.4 (7)  | 2.7 (6)  |
| C211 | 35.5 (9) | 24.8 (8) | 29.1 (8) | 1.4 (6)   | -0.2 (7)  | -2.6 (7) |

|      |          |          |          |          |          |          |
|------|----------|----------|----------|----------|----------|----------|
| C107 | 25.9(8)  | 26.9(8)  | 38.5(9)  | 2.1(7)   | -5.4(7)  | 2.6(7)   |
| C202 | 23.4(8)  | 29.0(8)  | 37.5(9)  | 3.6(7)   | -2.5(7)  | -2.9(6)  |
| C113 | 28.1(9)  | 40.2(9)  | 30.8(9)  | 2.7(7)   | -1.2(7)  | 1.3(8)   |
| C210 | 35.4(9)  | 34.2(9)  | 28.3(8)  | 3.1(7)   | 1.1(7)   | 0.3(8)   |
| C201 | 28.6(9)  | 27.7(8)  | 40.9(9)  | -0.1(7)  | -4.8(7)  | -1.9(7)  |
| C213 | 28.3(9)  | 35.9(9)  | 33.4(9)  | 5.1(7)   | 0.6(7)   | 3.6(7)   |
| C117 | 27.0(9)  | 33.4(8)  | 33.2(9)  | 1.7(7)   | 4.1(7)   | 1.5(7)   |
| C217 | 32.9(10) | 38.0(9)  | 35.1(9)  | 9.6(8)   | -0.5(7)  | 4.8(8)   |
| C209 | 27.6(9)  | 33.2(9)  | 36.9(9)  | 12.6(8)  | 0.1(7)   | -0.3(7)  |
| C208 | 30.5(9)  | 23.9(8)  | 40.3(9)  | 5.4(7)   | -5.6(7)  | -2.3(7)  |
| C111 | 32.5(9)  | 29.7(8)  | 31.9(9)  | -1.1(7)  | 0.0(7)   | 0.7(7)   |
| C108 | 34.2(10) | 25.0(8)  | 46.4(10) | -4.9(7)  | -9.5(8)  | 1.6(7)   |
| C110 | 41.2(11) | 35.2(9)  | 30.4(9)  | -0.7(7)  | 1.9(7)   | 4.9(8)   |
| C114 | 37.1(10) | 57.6(12) | 29.1(9)  | 5.3(8)   | -2.6(8)  | 5.3(9)   |
| C116 | 33.3(10) | 38.5(9)  | 42.2(10) | 8.1(8)   | 10.6(8)  | 1.4(8)   |
| C109 | 41.3(11) | 33.9(9)  | 37.3(10) | -8.7(7)  | -5.8(8)  | 8.4(8)   |
| C214 | 40.9(11) | 36.7(9)  | 37.7(9)  | 1.2(8)   | 8.7(8)   | 5.0(8)   |
| C27A | 39.4(10) | 27.9(8)  | 35.8(9)  | -3.6(7)  | -4.4(8)  | 1.4(8)   |
| C216 | 46.2(11) | 51.2(11) | 31.3(10) | 10.0(8)  | -7.4(8)  | 3.1(10)  |
| C17A | 35.2(10) | 31.1(9)  | 46.2(11) | 3.8(8)   | -1.4(8)  | -3.7(8)  |
| C215 | 54.6(13) | 46.4(11) | 25.8(8)  | 2.8(8)   | 4.1(8)   | -4.1(10) |
| C115 | 42.2(11) | 53.1(12) | 32.6(9)  | 14.9(9)  | 7.2(8)   | 9.7(9)   |
| C29A | 44.6(12) | 47.7(11) | 47.0(11) | 17.9(9)  | 4.3(9)   | -7.3(10) |
| C19A | 64.0(15) | 46.0(11) | 44.8(12) | -16.5(9) | -4.6(11) | 9.3(11)  |

**Table 4 Bond Lengths for af9.**

| Atom Atom | Length/Å   | Atom Atom | Length/Å |
|-----------|------------|-----------|----------|
| F1B C101  | 1.336(2)   | C103 C112 | 1.483(2) |
| F1E C201  | 1.335(2)   | C112 C113 | 1.397(2) |
| F1C C101  | 1.335(2)   | C112 C117 | 1.399(2) |
| F1F C201  | 1.334(2)   | C106 C107 | 1.401(2) |
| F1A C101  | 1.329(2)   | C106 C111 | 1.387(2) |
| F1D C201  | 1.330(2)   | C211 C210 | 1.387(2) |
| O102 C102 | 1.206(2)   | C107 C108 | 1.393(3) |
| O008 C202 | 1.211(2)   | C107 C17A | 1.508(3) |
| N104 N105 | 1.3178(19) | C202 C201 | 1.551(3) |
| N104 C103 | 1.307(2)   | C113 C114 | 1.386(3) |
| N204 N205 | 1.329(2)   | C210 C209 | 1.391(3) |
| N204 C203 | 1.302(2)   | C213 C214 | 1.385(3) |
| N105 C106 | 1.412(2)   | C117 C116 | 1.387(2) |
| N205 C206 | 1.408(2)   | C217 C216 | 1.384(3) |
| C206 C207 | 1.401(2)   | C209 C208 | 1.387(3) |
| C206 C211 | 1.391(2)   | C209 C29A | 1.510(3) |
| C207 C208 | 1.391(2)   | C111 C110 | 1.384(2) |
| C207 C27A | 1.512(2)   | C108 C109 | 1.394(3) |

|           |           |           |           |
|-----------|-----------|-----------|-----------|
| C203 C212 | 1.489 (2) | C110 C109 | 1.388 (3) |
| C203 C202 | 1.460 (2) | C114 C115 | 1.383 (3) |
| C102 C101 | 1.557 (2) | C116 C115 | 1.387 (3) |
| C102 C103 | 1.464 (2) | C109 C19A | 1.513 (3) |
| C212 C213 | 1.392 (3) | C214 C215 | 1.378 (3) |
| C212 C217 | 1.390 (2) | C216 C215 | 1.383 (3) |

**Table 5 Bond Angles for af9.**

| Atom Atom Atom | Angle/°     | Atom Atom Atom | Angle/°     |
|----------------|-------------|----------------|-------------|
| C103 N104 N105 | 121.23 (14) | C210 C211 C206 | 119.55 (16) |
| C203 N204 N205 | 118.47 (14) | C106 C107 C17A | 121.14 (17) |
| N104 N105 C106 | 119.26 (14) | C108 C107 C106 | 117.42 (17) |
| N204 N205 C206 | 120.64 (14) | C108 C107 C17A | 121.41 (16) |
| C207 C206 N205 | 117.84 (15) | O008 C202 C203 | 124.40 (17) |
| C211 C206 N205 | 121.11 (15) | O008 C202 C201 | 117.53 (16) |
| C211 C206 C207 | 121.04 (15) | C203 C202 C201 | 118.07 (15) |
| C206 C207 C27A | 121.22 (15) | C114 C113 C112 | 120.21 (18) |
| C208 C207 C206 | 117.51 (16) | C211 C210 C209 | 120.90 (17) |
| C208 C207 C27A | 121.25 (15) | F1E C201 C202  | 112.62 (15) |
| N204 C203 C212 | 124.48 (15) | F1F C201 F1E   | 107.27 (15) |
| N204 C203 C202 | 115.23 (15) | F1F C201 C202  | 112.88 (15) |
| C202 C203 C212 | 120.14 (14) | F1D C201 F1E   | 106.96 (15) |
| O102 C102 C101 | 116.94 (15) | F1D C201 F1F   | 106.79 (16) |
| O102 C102 C103 | 125.65 (16) | F1D C201 C202  | 109.97 (15) |
| C103 C102 C101 | 117.35 (14) | C214 C213 C212 | 120.37 (17) |
| C213 C212 C203 | 119.55 (15) | C116 C117 C112 | 120.51 (18) |
| C217 C212 C203 | 121.19 (16) | C216 C217 C212 | 120.00 (18) |
| C217 C212 C213 | 119.21 (16) | C210 C209 C29A | 120.48 (18) |
| F1B C101 C102  | 114.25 (14) | C208 C209 C210 | 118.32 (16) |
| F1C C101 F1B   | 107.47 (14) | C208 C209 C29A | 121.18 (18) |
| F1C C101 C102  | 111.49 (14) | C209 C208 C207 | 122.60 (16) |
| F1A C101 F1B   | 106.52 (15) | C110 C111 C106 | 119.78 (17) |
| F1A C101 F1C   | 106.90 (15) | C107 C108 C109 | 122.62 (17) |
| F1A C101 C102  | 109.85 (14) | C111 C110 C109 | 121.11 (18) |
| N104 C103 C102 | 112.80 (14) | C115 C114 C113 | 120.26 (19) |
| N104 C103 C112 | 126.89 (15) | C117 C116 C115 | 119.75 (19) |
| C102 C103 C112 | 120.26 (14) | C108 C109 C19A | 121.49 (18) |
| C113 C112 C103 | 121.05 (16) | C110 C109 C108 | 118.01 (17) |
| C113 C112 C117 | 118.96 (16) | C110 C109 C19A | 120.48 (19) |
| C117 C112 C103 | 119.97 (16) | C215 C214 C213 | 120.07 (18) |
| C107 C106 N105 | 118.44 (16) | C215 C216 C217 | 120.40 (18) |
| C111 C106 N105 | 120.46 (15) | C214 C215 C216 | 119.91 (18) |
| C111 C106 C107 | 121.04 (16) | C114 C115 C116 | 120.25 (17) |

**Table 6 Hydrogen Atom Coordinates ( $\text{\AA}\times 10^4$ ) and Isotropic Displacement Parameters ( $\text{\AA}^2\times 10^3$ ) for af9.**

| Atom | x        | y       | z       | U(eq) |
|------|----------|---------|---------|-------|
| H105 | 1506.92  | 5073.73 | 6538.2  | 33    |
| H205 | 6518.39  | 5107.37 | 5982.04 | 35    |
| H211 | 5792.05  | 6123.96 | 6883.35 | 36    |
| H113 | 3237.92  | 7839.32 | 7297.9  | 40    |
| H210 | 4550.92  | 4923.57 | 7346.31 | 39    |
| H213 | 8851.85  | 5590.07 | 5654.75 | 39    |
| H117 | -488.9   | 5782.47 | 6856.48 | 37    |
| H217 | 5232.51  | 8020.68 | 5357.57 | 42    |
| H208 | 4168.39  | 1950.25 | 6651.74 | 38    |
| H111 | 2984.48  | 6217.66 | 5708.82 | 38    |
| H108 | 626.92   | 2198.32 | 5607.94 | 42    |
| H110 | 2962.4   | 5172.49 | 5143.84 | 43    |
| H114 | 2602.02  | 7025.87 | 7878    | 49    |
| H116 | -1060.52 | 4927.14 | 7435.7  | 46    |
| H214 | 8801.58  | 4693.5  | 5067.63 | 46    |
| H27A | 4828.88  | 3319.78 | 5857.89 | 52    |
| H27B | 5251.33  | 1990.09 | 6049.93 | 52    |
| H27C | 6679.83  | 2998.87 | 5972.04 | 52    |
| H216 | 5187.88  | 7108.29 | 4772.67 | 51    |
| H17A | 1063.35  | 2911.37 | 6496.89 | 56    |
| H17B | -189.1   | 2188.55 | 6229.77 | 56    |
| H17C | -638.14  | 3567.77 | 6386.16 | 56    |
| H215 | 6918.15  | 5410.6  | 4632.76 | 51    |
| H115 | 495.38   | 5547.44 | 7945.49 | 51    |
| H29A | 3685.36  | 2854.91 | 7579.79 | 70    |
| H29B | 3546.15  | 1667.51 | 7306.06 | 70    |
| H29C | 2127.6   | 2719.25 | 7314.39 | 70    |
| H19A | 2822.86  | 2666.73 | 4874.1  | 77    |
| H19B | 1283.68  | 3526.28 | 4760.46 | 77    |
| H19C | 998.53   | 2186.64 | 4959.31 | 77    |

### Refinement model description

Number of restraints - 0, number of constraints - unknown.

Details:

1. Twinned data refinement

Scales: 0.84(10)

0.16(10)

2. Fixed Uiso

At 1.2 times of:

All C(H) groups, All N(H) groups

At 1.5 times of:

All C(H,H,H) groups

3.a Aromatic/amide H refined with riding coordinates:

N105(H105), N205(H205), C211(H211), C113(H113), C210(H210), C213(H213),  
C117(H117), C217(H217), C208(H208), C111(H111), C108(H108), C110(H110),  
C114(H114), C116(H116), C214(H214), C216(H216), C215(H215), C115(H115)

3.b Idealised Me refined as rotating group:

C27A (H27A, H27B, H27C), C17A (H17A, H17B, H17C), C29A (H29A, H29B, H29C),  
 C19A (H19A,  
 H19B, H19C)

This report has been created with Olex2, compiled on 2018.05.29 svn.r3508 for OlexSys. Please [let us know](#) if there are any errors or if you would like to have additional features.

E-1b

### Experimental

Single crystals of C<sub>17</sub>H<sub>15</sub>F<sub>3</sub>N<sub>2</sub>O (**E3,4**) were grown from methanol. A suitable crystal was selected and mounted on a glass fibre with Fomblin oil and placed on a Rigaku Oxford Diffraction SuperNova diffractometer with a dual source (Cu at zero) equipped with an AtlasS2 CCD area detector. The crystal was kept at 150(2) K during data collection. Using Olex2 [1], the structure was solved with the ShelXT [2] structure solution program using Intrinsic Phasing and refined with the ShelXL [3] refinement package using Least Squares minimisation.

**Crystal Data** for C<sub>17</sub>H<sub>15</sub>F<sub>3</sub>N<sub>2</sub>O (*M* = 320.31 g/mol): monoclinic, space group P2<sub>1</sub>/c (no. 14), *a* = 12.5454(2) Å, *b* = 8.12670(15) Å, *c* = 15.8452(2) Å,  $\beta$  = 108.6141(17)°, *V* = 1530.96(5) Å<sup>3</sup>, *Z* = 4, *T* = 150(2) K,  $\mu$ (CuK $\alpha$ ) = 0.962 mm<sup>-1</sup>, *D*<sub>calc</sub> = 1.390 g/cm<sup>3</sup>, 14916 reflections measured (7.436° ≤ 2 $\theta$  ≤ 147.612°), 3052 unique (*R*<sub>int</sub> = 0.0196, *R*<sub>sigma</sub> = 0.0137) which were used in all calculations. The final *R*<sub>1</sub> was 0.0387 (*I* > 2 $\sigma$ (*I*)) and *wR*<sub>2</sub> was 0.1042 (all data).

**Table 1 Crystal data and structure refinement for 1b.**

|                                                              |                                                                              |
|--------------------------------------------------------------|------------------------------------------------------------------------------|
| Identification code                                          | 1b                                                                           |
| Empirical formula                                            | C <sub>17</sub> H <sub>15</sub> F <sub>3</sub> N <sub>2</sub> O              |
| Formula weight                                               | 320.31                                                                       |
| Temperature/K                                                | 150(2)                                                                       |
| Crystal system                                               | monoclinic                                                                   |
| Space group                                                  | P2 <sub>1</sub> /c                                                           |
| <i>a</i> /Å                                                  | 12.5454(2)                                                                   |
| <i>b</i> /Å                                                  | 8.12670(15)                                                                  |
| <i>c</i> /Å                                                  | 15.8452(2)                                                                   |
| $\alpha$ /°                                                  | 90                                                                           |
| $\beta$ /°                                                   | 108.6141(17)                                                                 |
| $\gamma$ /°                                                  | 90                                                                           |
| Volume/Å <sup>3</sup>                                        | 1530.96(5)                                                                   |
| <i>Z</i>                                                     | 4                                                                            |
| $\rho$ <sub>calc</sub> /g/cm <sup>3</sup>                    | 1.390                                                                        |
| $\mu$ /mm <sup>-1</sup>                                      | 0.962                                                                        |
| <i>F</i> (000)                                               | 664.0                                                                        |
| Crystal size/mm <sup>3</sup>                                 | 0.2 × 0.2 × 0.2 yellow block                                                 |
| Radiation                                                    | CuK $\alpha$ ( $\lambda$ = 1.54184)                                          |
| 2 $\theta$ range for data collection/°                       | 7.436 to 147.612                                                             |
| Index ranges                                                 | -15 ≤ <i>h</i> ≤ 15, -8 ≤ <i>k</i> ≤ 10, -19 ≤ <i>l</i> ≤ 19                 |
| Reflections collected                                        | 14916                                                                        |
| Independent reflections                                      | 3052 [ <i>R</i> <sub>int</sub> = 0.0196, <i>R</i> <sub>sigma</sub> = 0.0137] |
| Data/restraints/parameters                                   | 3052/0/210                                                                   |
| Goodness-of-fit on <i>F</i> <sup>2</sup>                     | 1.033                                                                        |
| Final <i>R</i> indexes [ <i>I</i> ≥ 2 $\sigma$ ( <i>I</i> )] | <i>R</i> <sub>1</sub> = 0.0387, <i>wR</i> <sub>2</sub> = 0.1018              |

Final R indexes [all data]  $R_1 = 0.0407$ ,  $wR_2 = 0.1042$

Largest diff. peak/hole / e  $\text{\AA}^{-3}$  0.30/-0.26

**Table 2 Fractional Atomic Coordinates ( $\times 10^4$ ) and Equivalent Isotropic Displacement Parameters ( $\text{\AA}^2 \times 10^3$ ) for af10.  $U_{eq}$  is defined as 1/3 of the trace of the orthogonalised  $U_{ij}$  tensor.**

| Atom | <i>x</i>     | <i>y</i>    | <i>z</i>    | $U_{eq}$ |
|------|--------------|-------------|-------------|----------|
| F1A  | 2490.1 (6)   | 6725.7 (11) | 8527.8 (6)  | 35.0 (2) |
| F1C  | 3317.9 (7)   | 4567.1 (11) | 9208.9 (6)  | 39.0 (2) |
| O2   | 5251.3 (7)   | 7103.2 (11) | 9002.4 (5)  | 26.4 (2) |
| F1B  | 3771.6 (8)   | 6945.9 (15) | 9792.1 (6)  | 53.1 (3) |
| N5   | 3073.1 (8)   | 3990.2 (13) | 6642.8 (6)  | 22.8 (2) |
| N4   | 3288.0 (8)   | 4813.5 (13) | 7391.3 (6)  | 21.4 (2) |
| C3   | 4291.0 (10)  | 5450.9 (15) | 7761.2 (7)  | 20.8 (3) |
| C12  | 5230.0 (9)   | 5456.5 (15) | 7377.7 (7)  | 20.4 (3) |
| C6   | 1964.7 (10)  | 3499.0 (15) | 6175.1 (8)  | 22.2 (3) |
| C17  | 5037.0 (10)  | 6043.3 (15) | 6511.9 (8)  | 23.9 (3) |
| C2   | 4429.5 (10)  | 6295.7 (16) | 8594.2 (7)  | 21.8 (3) |
| C13  | 6303.0 (10)  | 4917.5 (16) | 7866.8 (8)  | 24.9 (3) |
| C11  | 1765.1 (10)  | 2790.5 (16) | 5340.6 (8)  | 24.3 (3) |
| C10  | 677.8 (10)   | 2370.7 (16) | 4817.0 (8)  | 25.4 (3) |
| C7   | 1084.5 (11)  | 3778.1 (17) | 6510.1 (8)  | 27.6 (3) |
| C14  | 7165.8 (11)  | 4970.9 (17) | 7496.5 (9)  | 29.5 (3) |
| C16  | 5901.6 (11)  | 6083.0 (17) | 6141.7 (8)  | 27.9 (3) |
| C9   | -221.5 (10)  | 2668.3 (17) | 5142.8 (8)  | 27.0 (3) |
| C15  | 6965.8 (11)  | 5549.8 (17) | 6636.3 (9)  | 29.5 (3) |
| C1   | 3478.8 (11)  | 6129.2 (17) | 9025.7 (8)  | 27.6 (3) |
| C8   | 4.5 (11)     | 3352.6 (18) | 5986.7 (9)  | 30.1 (3) |
| C9A  | -1413.7 (11) | 2256 (2)    | 4593.0 (10) | 35.6 (3) |
| C10A | 476.2 (12)   | 1643 (2)    | 3903.8 (9)  | 35.4 (3) |

**Table 3 Anisotropic Displacement Parameters ( $\text{\AA}^2 \times 10^3$ ) for af10. The Anisotropic displacement factor exponent takes the form:  $-2\pi^2[h^2a^{*2}U_{11}+2hka^*b^*U_{12}+\dots]$ .**

| Atom | $U_{11}$ | $U_{22}$ | $U_{33}$ | $U_{23}$  | $U_{13}$ | $U_{12}$  |
|------|----------|----------|----------|-----------|----------|-----------|
| F1A  | 26.5 (4) | 39.3 (5) | 42.2 (5) | -1.6 (4)  | 15.1 (3) | 3.6 (3)   |
| F1C  | 41.3 (5) | 40.7 (5) | 41.5 (5) | 11.9 (4)  | 22.2 (4) | -2.3 (4)  |
| O2   | 23.9 (4) | 33.2 (5) | 21.2 (4) | -4.6 (4)  | 5.7 (3)  | -6.9 (4)  |
| F1B  | 41.9 (5) | 88.6 (8) | 36.9 (5) | -35.1 (5) | 24.0 (4) | -27.1 (5) |
| N5   | 17.7 (5) | 28.8 (6) | 21.1 (5) | -5.3 (4)  | 5.2 (4)  | -0.8 (4)  |
| N4   | 21.0 (5) | 22.7 (5) | 18.8 (5) | -0.9 (4)  | 4.2 (4)  | -0.1 (4)  |
| C3   | 20.0 (5) | 22.5 (6) | 18.7 (5) | 1.0 (4)   | 4.3 (4)  | -0.1 (4)  |
| C12  | 20.8 (6) | 20.6 (6) | 19.2 (5) | -1.6 (4)  | 5.5 (4)  | -1.9 (4)  |
| C6   | 18.5 (5) | 23.7 (6) | 22.5 (6) | -0.4 (5)  | 3.8 (4)  | -1.3 (5)  |
| C17  | 23.6 (6) | 25.2 (6) | 21.2 (6) | 2.4 (5)   | 4.7 (5)  | 0.8 (5)   |
| C2   | 20.7 (5) | 25.3 (6) | 19.0 (5) | 1.0 (5)   | 5.5 (4)  | -1.5 (5)  |
| C13  | 24.0 (6) | 27.6 (6) | 21.0 (6) | 2.6 (5)   | 4.4 (5)  | 1.0 (5)   |



|      |          |          |          |           |          |          |
|------|----------|----------|----------|-----------|----------|----------|
| C11  | 21.1 (6) | 27.3 (6) | 24.2 (6) | -2.5 (5)  | 6.9 (5)  | 0.6 (5)  |
| C10  | 24.3 (6) | 25.4 (6) | 23.7 (6) | -1.9 (5)  | 3.8 (5)  | -1.3 (5) |
| C7   | 24.1 (6) | 35.6 (7) | 23.3 (6) | -5.1 (5)  | 7.9 (5)  | -3.2 (5) |
| C14  | 21.6 (6) | 33.2 (7) | 32.5 (7) | 2.7 (5)   | 6.8 (5)  | 4.2 (5)  |
| C16  | 32.7 (6) | 29.7 (7) | 23.1 (6) | 2.9 (5)   | 11.4 (5) | -1.2 (5) |
| C9   | 20.9 (6) | 29.1 (7) | 28.5 (6) | 1.3 (5)   | 4.3 (5)  | -3.8 (5) |
| C15  | 28.9 (6) | 30.8 (7) | 33.9 (7) | 0.5 (5)   | 17.1 (5) | -0.7 (5) |
| C1   | 25.8 (6) | 34.7 (7) | 23.1 (6) | -6.6 (5)  | 9.0 (5)  | -6.7 (5) |
| C8   | 21.4 (6) | 38.8 (8) | 32.2 (7) | -2.4 (6)  | 11.3 (5) | -3.2 (5) |
| C9A  | 22.9 (6) | 44.7 (8) | 35.5 (7) | -2.0 (6)  | 4.1 (5)  | -8.0 (6) |
| C10A | 29.3 (7) | 43.9 (8) | 28.4 (7) | -10.2 (6) | 2.7 (5)  | -1.2 (6) |

**Table 4 Bond Lengths for af10.**

| Atom Atom | Length/Å    | Atom Atom | Length/Å    |
|-----------|-------------|-----------|-------------|
| F1A C1    | 1.3308 (15) | C6 C7     | 1.3880 (17) |
| F1C C1    | 1.3319 (17) | C17 C16   | 1.3884 (17) |
| O2 C2     | 1.2191 (15) | C2 C1     | 1.5585 (16) |
| F1B C1    | 1.3286 (15) | C13 C14   | 1.3869 (18) |
| N5 N4     | 1.3127 (14) | C11 C10   | 1.3939 (17) |
| N5 C6     | 1.4086 (15) | C10 C9    | 1.4035 (18) |
| N4 C3     | 1.3131 (15) | C10 C10A  | 1.5077 (18) |
| C3 C12    | 1.4879 (16) | C7 C8     | 1.3877 (18) |
| C3 C2     | 1.4482 (16) | C14 C15   | 1.3870 (19) |
| C12 C17   | 1.3986 (16) | C16 C15   | 1.3844 (19) |
| C12 C13   | 1.3923 (17) | C9 C8     | 1.3912 (19) |
| C6 C11    | 1.3897 (17) | C9 C9A    | 1.5088 (17) |

**Table 5 Bond Angles for af10.**

| Atom Atom Atom | Angle/°     | Atom Atom Atom | Angle/°     |
|----------------|-------------|----------------|-------------|
| N4 N5 C6       | 120.22 (10) | C11 C10 C9     | 119.19 (11) |
| N5 N4 C3       | 119.70 (10) | C11 C10 C10A   | 119.99 (11) |
| N4 C3 C12      | 126.14 (10) | C9 C10 C10A    | 120.81 (11) |
| N4 C3 C2       | 114.39 (10) | C8 C7 C6       | 118.36 (11) |
| C2 C3 C12      | 119.37 (10) | C13 C14 C15    | 120.37 (12) |
| C17 C12 C3     | 119.34 (10) | C15 C16 C17    | 119.73 (11) |
| C13 C12 C3     | 121.51 (10) | C10 C9 C9A     | 120.96 (12) |
| C13 C12 C17    | 119.15 (11) | C8 C9 C10      | 118.77 (11) |
| C11 C6 N5      | 117.76 (11) | C8 C9 C9A      | 120.27 (12) |
| C7 C6 N5       | 121.65 (11) | C16 C15 C14    | 120.11 (12) |
| C7 C6 C11      | 120.52 (11) | F1A C1 F1C     | 107.40 (10) |
| C16 C17 C12    | 120.56 (11) | F1A C1 C2      | 114.03 (10) |
| O2 C2 C3       | 125.02 (11) | F1C C1 C2      | 111.64 (11) |
| O2 C2 C1       | 116.74 (10) | F1B C1 F1A     | 107.06 (11) |
| C3 C2 C1       | 118.21 (10) | F1B C1 F1C     | 107.09 (11) |

|     |     |     |             |     |    |    |             |
|-----|-----|-----|-------------|-----|----|----|-------------|
| C14 | C13 | C12 | 120.08 (11) | F1B | C1 | C2 | 109.30 (10) |
| C6  | C11 | C10 | 120.84 (11) | C7  | C8 | C9 | 122.31 (12) |

**Table 6 Hydrogen Bonds for af10.**

| D  | H  | A               | d(D-H)/Å | d(H-A)/Å | d(D-A)/Å    | D-H-A/° |
|----|----|-----------------|----------|----------|-------------|---------|
| N5 | H5 | O2 <sup>1</sup> | 0.88     | 2.21     | 3.0311 (13) | 155.9   |

<sup>1</sup>1-X,-1/2+Y,3/2-Z

**Table 7 Hydrogen Atom Coordinates (Å×10<sup>4</sup>) and Isotropic Displacement Parameters (Å<sup>2</sup>×10<sup>3</sup>) for af10.**

| Atom | x        | y       | z       | U(eq) |
|------|----------|---------|---------|-------|
| H5   | 3623.33  | 3744.39 | 6432.36 | 27    |
| H17  | 4308.29  | 6417.9  | 6174.29 | 29    |
| H13  | 6444.21  | 4512.68 | 8454.85 | 30    |
| H11  | 2377.55  | 2589.72 | 5124.32 | 29    |
| H7   | 1218.11  | 4248.82 | 7083.39 | 33    |
| H14  | 7897.96  | 4609.02 | 7833.9  | 35    |
| H16  | 5763.36  | 6474.37 | 5551.39 | 33    |
| H15  | 7560.18  | 5580.53 | 6386.03 | 35    |
| H8   | -601.83  | 3534.98 | 6212.58 | 36    |
| H9AA | -1583.69 | 2755.67 | 4001.64 | 53    |
| H9AB | -1933.49 | 2686.81 | 4887.88 | 53    |
| H9AC | -1498.42 | 1059.4  | 4532.19 | 53    |
| H10A | -19.2    | 2371.54 | 3454.74 | 53    |
| H10B | 121.2    | 561.21  | 3873.46 | 53    |
| H10C | 1195.43  | 1524.65 | 3789.68 | 53    |

### Refinement model description

Number of restraints - 0, number of constraints - unknown.

Details:

1. Fixed Uiso

At 1.2 times of:

All C(H) groups, All N(H) groups

At 1.5 times of:

All C(H,H,H) groups

2.a Aromatic/amide H refined with riding coordinates:

N5(H5), C17(H17), C13(H13), C11(H11), C7(H7), C14(H14), C16(H16),  
C15(H15),

C8(H8)

2.b Idealised Me refined as rotating group:

C9A(H9AA,H9AB,H9AC), C10A(H10A,H10B,H10C)

This report has been created with Olex2, compiled on 2018.05.29 svn.r3508 for OlexSys. Please [let us know](#) if there are any errors or if you would like to have additional features.

#### 4. DFT calculations

Geometry optimizations have been carried out considering different starting points, corresponding to the different rotamers with respect to the bonds in the CO-C=N-NH-Ph segment (4 torsions involved). In all cases, both cis and trans isomers show only one clearly preferred conformation, the other ones being at least 5 kcal/mol less stable.

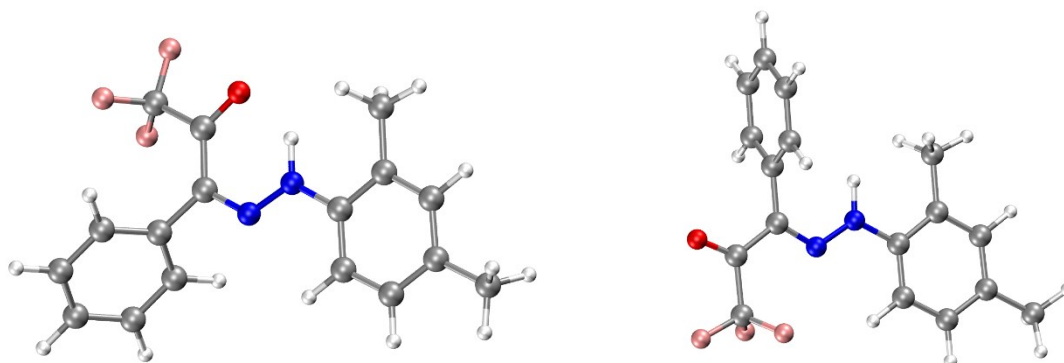

**Fig. ESI35.** Most stable minima for the *Z* and *E* isomers of hydrazone **1a**.

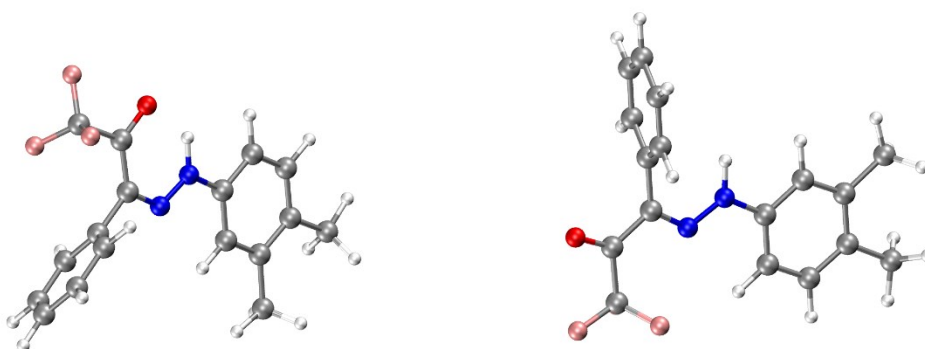

**Fig. ESI36.** Most stable minima for the *cis* and *trans* isomers of hydrazone **1b**.

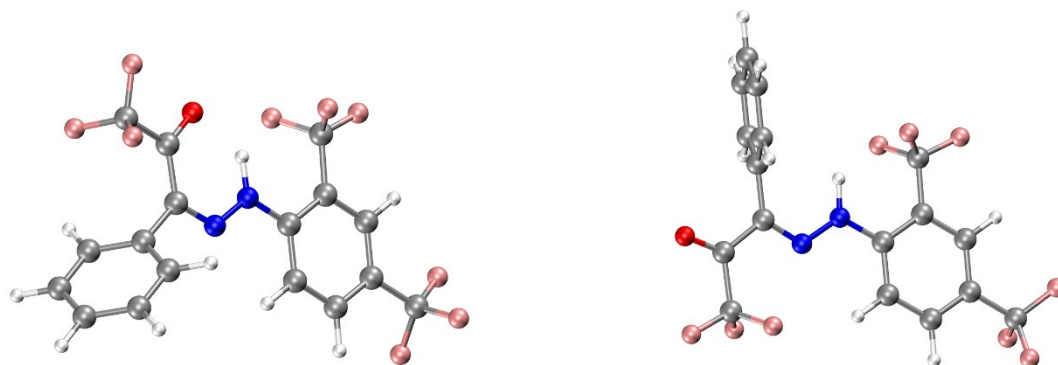

**Fig. ESI37.** Most stable minima for the *cis* and *trans* isomers of hydrazone **1c**.

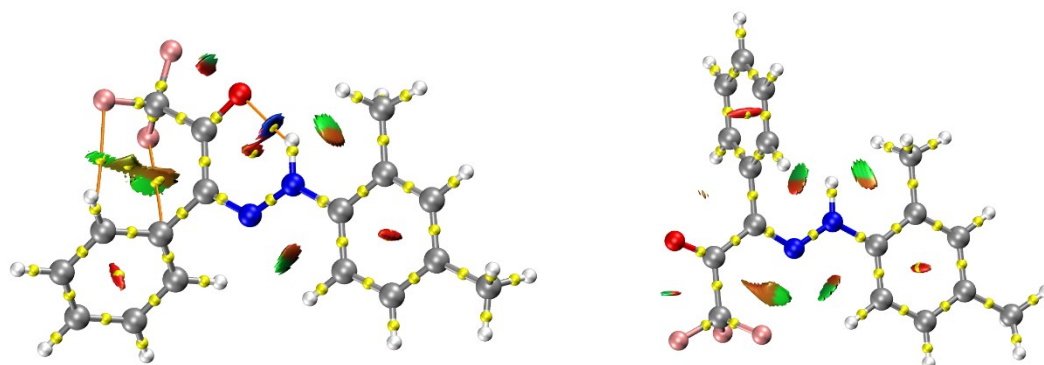

**Fig. ESI38.** Intramolecular non covalent interactions for the *Z* (left) and *E* (right) isomers of hydrazone **1a**.

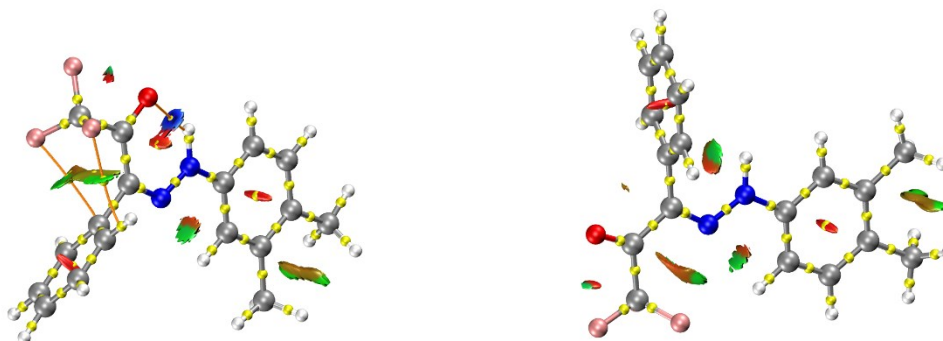

**Fig. ESI39.** Intramolecular non covalent interactions for the *Z*(left) and *E*(right) isomers of hydrazone **1b**.

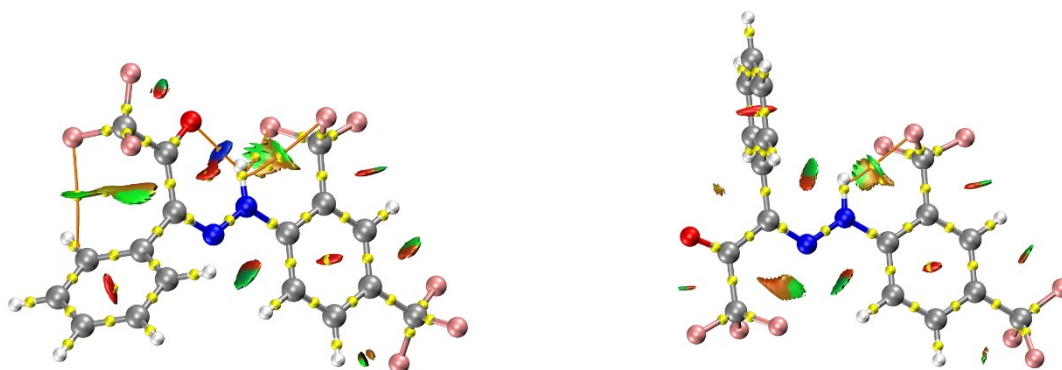

**Fig. ESI40.** Intramolecular non-covalent interactions for the *Z*(left) and *E* (right) isomers of hydrazone **1c**.

## Absorption spectra

Excitation energies in the relevant geometries, have been analyzed by TD-DFT calculations, with inclusion of solvent effects.

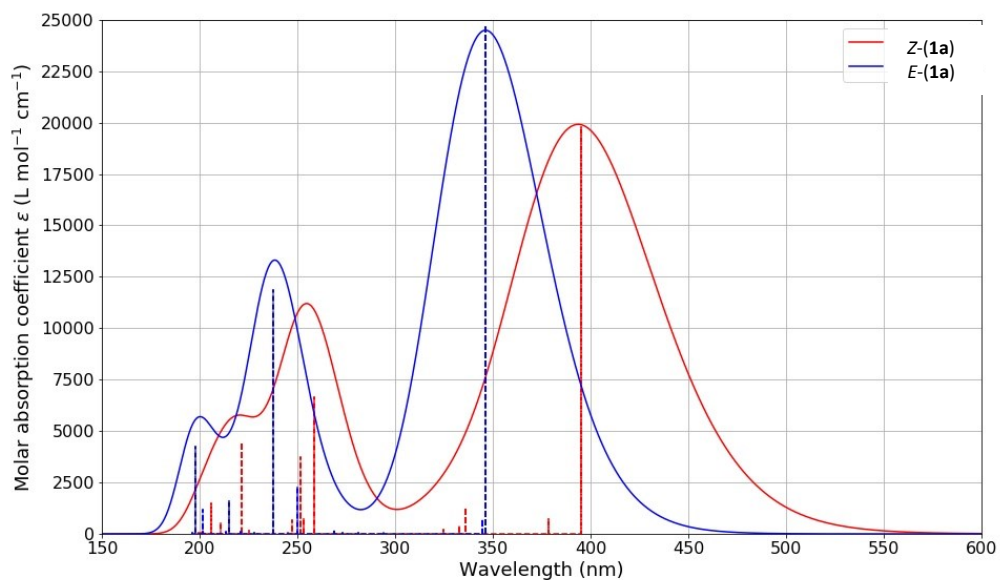

**Fig. ESI41.** Simulated absorption spectra for the *E* (blue) and *Z* (red) of hydrazone **1a** in the gas phase.

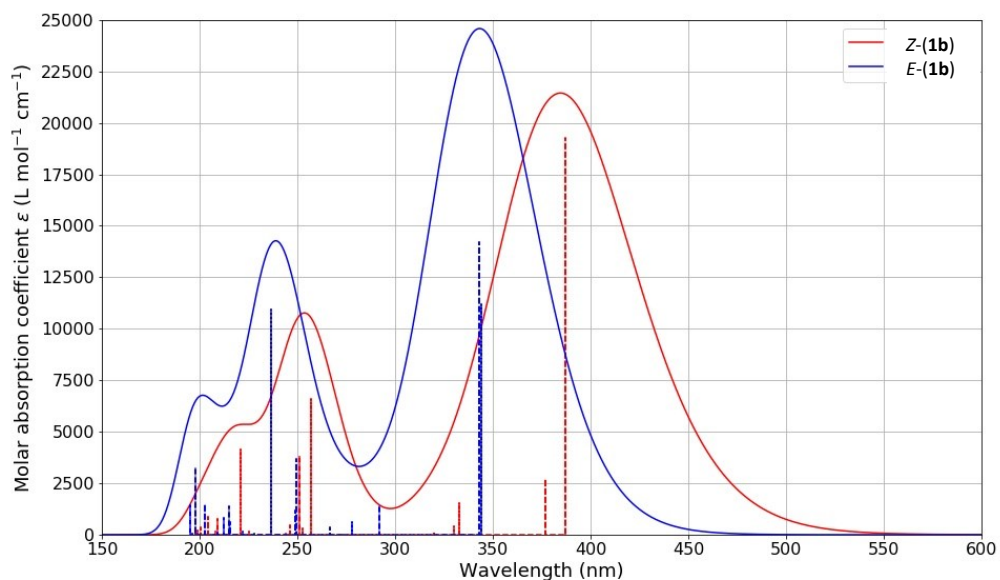

**Fig. ESI42.** Simulated absorption spectra for the *E* (blue) and *Z* (red) of hydrazone **1b** in the gas phase.

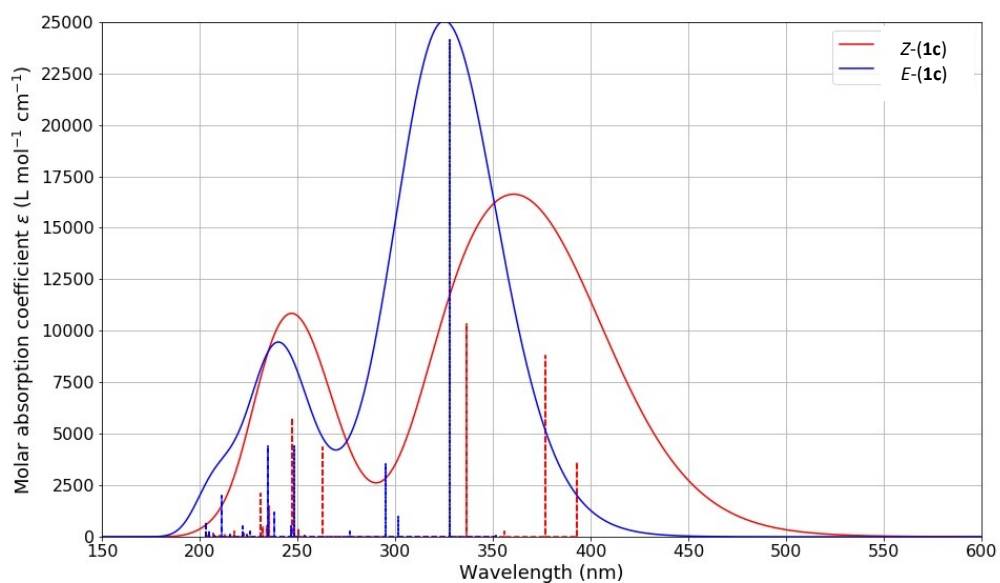

**Fig. ESI43.** Simulated absorption spectra for the *E* (blue) and *Z* (red) of hydrazone **1c** in the gas phase.

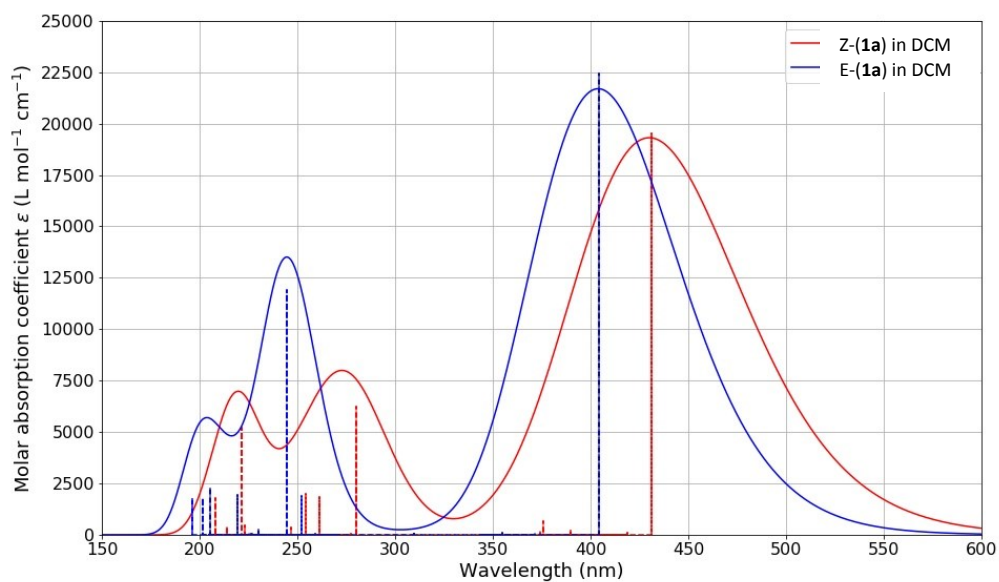

**Fig. ESI44.** Simulated absorption spectra for the *E* (blue) and *Z* (red) of hydrazone **1a** in dichloromethane

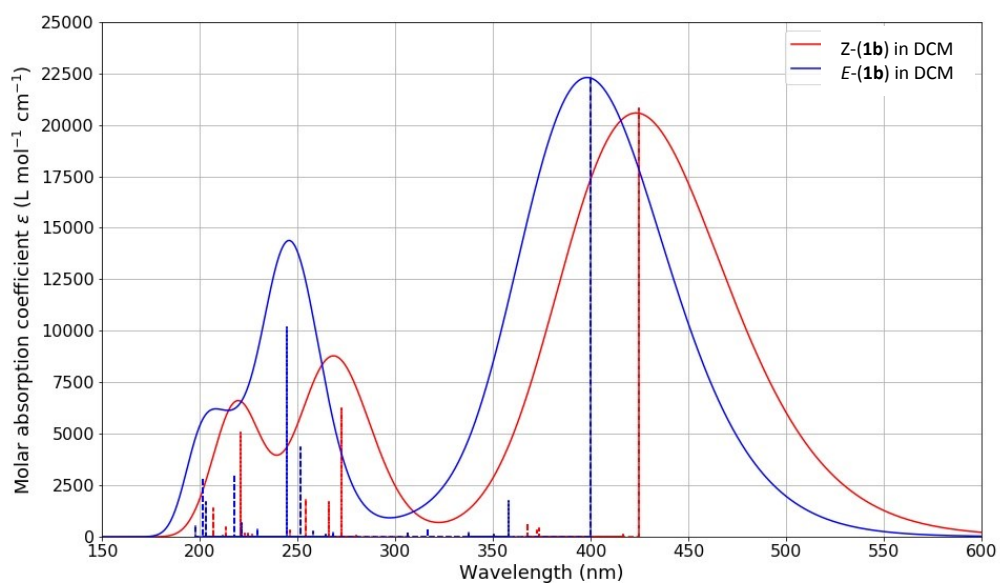

**Fig. ESI45.** Simulated absorption spectra for the *E* (blue) and *Z* (red) of hydrazone **1b** in dichloromethane.

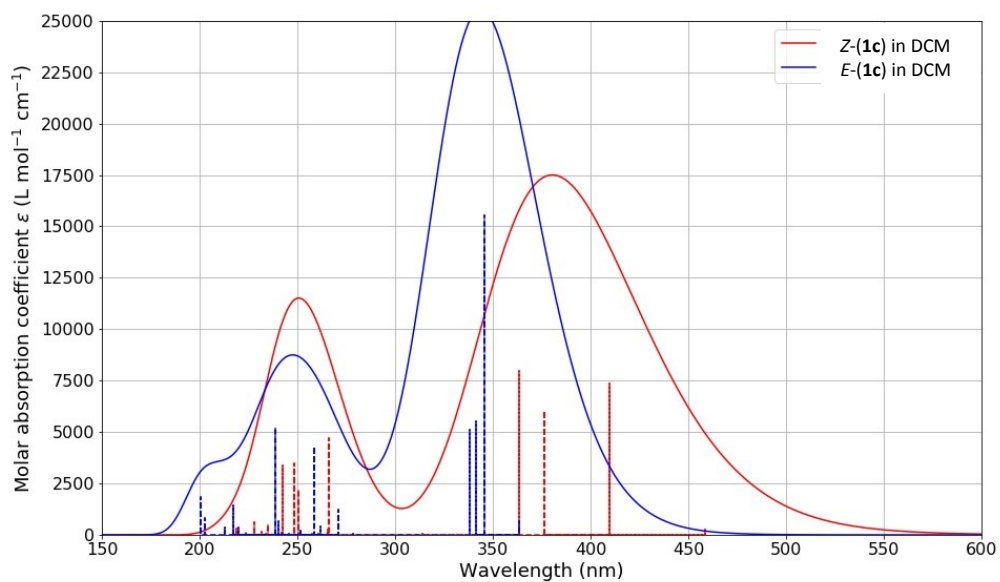

**Fig. ESI46.** Simulated absorption spectra for the *E* (blue) and *Z* (red) of hydrazone **1c** in dichloromethane.

## HOMO-LUMO frontier orbitals

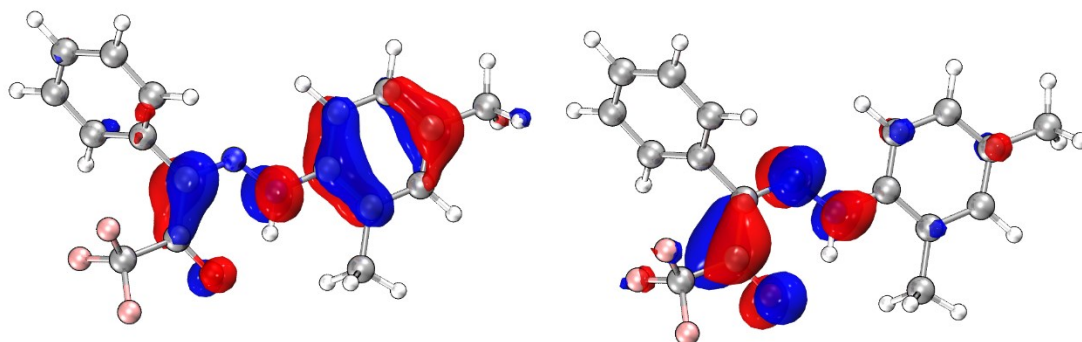

**Fig. ESI47.** HOMO and LUMO orbitals for (Z) -1a.

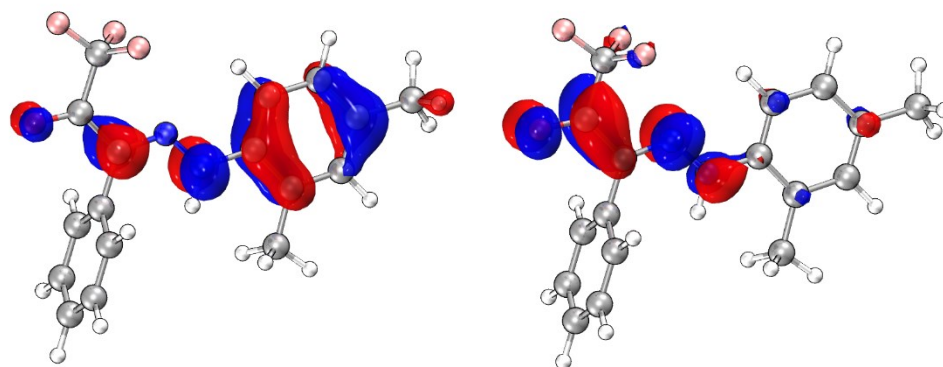

**Fig. ESI48.** HOMO and LUMO orbitals for (E) -1a.

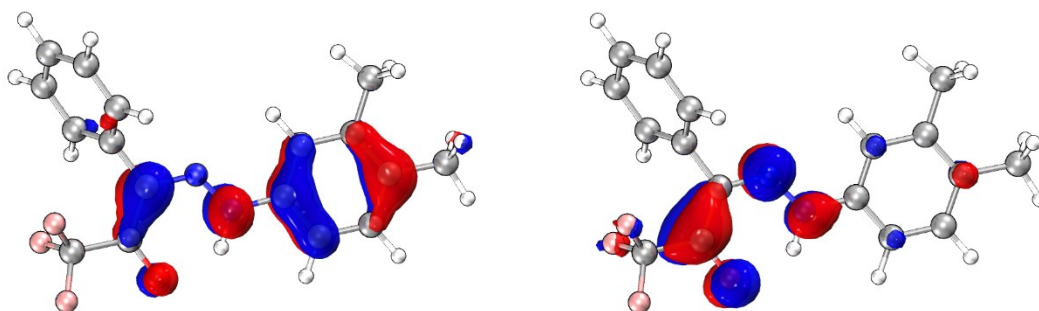

**Fig. ESI49.** HOMO and LUMO orbitals for (Z) -1b.

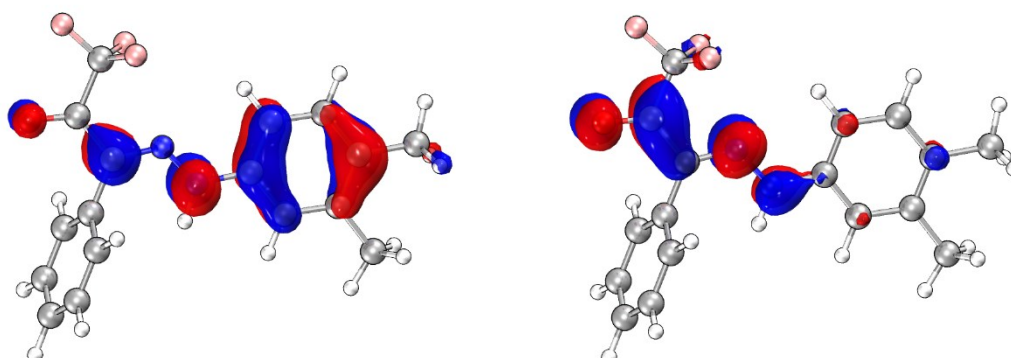

**Fig ESI50.** HOMO and LUMO orbitals for (E)-1b.



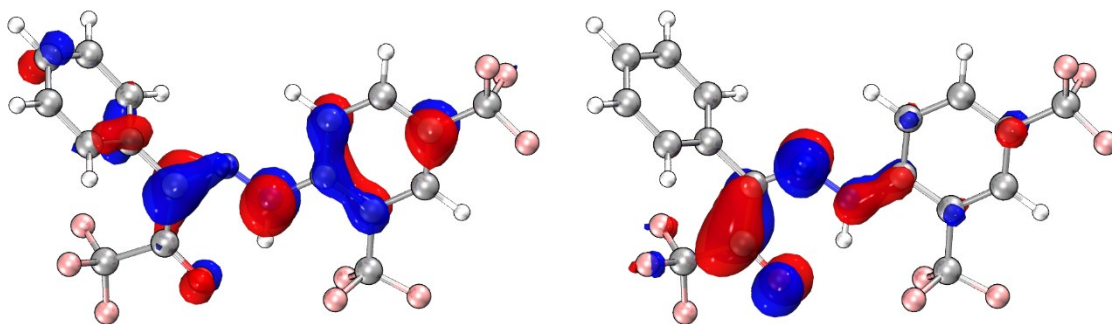

**Fig. ESI51.** HOMO and LUMO orbitals for (Z) -1c.

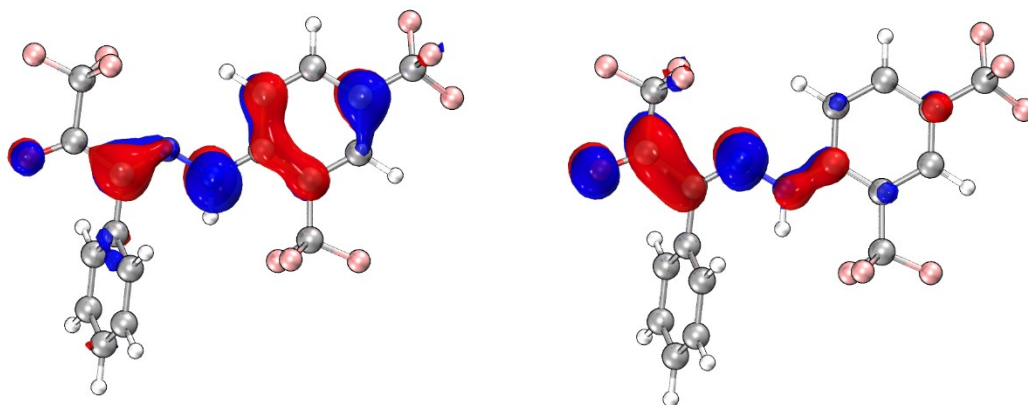

**Fig. ESI52.** HOMO and LUMO orbitals for (Z) -1c.

## 5. Kinetic studies of back thermal isomerization

A solution of hydrazone (10 mg) in  $C_2D_2Cl_4$  (0.5 mL) into a NMR tube was irradiated in a Rayonet photochemical reactor equipped with UV lamps (8 x 8W) for a reaction time sufficient to have over 40% a conversion of *E* diastereoisomer into the *Z* one. Then, the reaction progressive curve of the thermal back isomerization ( $Z \rightarrow E$ ) was monitored by measuring a series of  $^1H$ -NMR spectra (400 MHz) recorded as pseudo 2D at the temperature indicated for each sample, allowing a fixed time delay between successive spectra. Pulse width of  $30^\circ$  and relaxation delay of 2 seconds were used, in order to avoid errors due to the relaxation an exponential filter was applied to the FIDs for optimization of signal-to-noise ratio. Baseline correction was applied to spectra before integration. Bias and slope of integrals were carefully adjusted.

Analysis of the data points to a first-order reaction in the (*Z*) isomer concentration or (*E*) formation. The observed reaction rate constant  $k_{obs}$  ( $s^{-1}$ ) was obtained by linear regression of  $\ln([Z]/[Z]_0)$  vs. time. The activation energy barrier  $\Delta G^\ddagger$  ( $kcal\ mol^{-1}$ ) was calculated using the Eyring equation. The half-life time  $\tau_{1/2}$  (s) was calculated by the following equation:  $\tau_{1/2} = 0.693/k_{obs}$ .

### Thermal isomerization of (*Z*)-1a into (*E*)-1a at T=300 K

$k_{obs} = 1.60 \cdot 10^{-5}\ s^{-1}$ ,  $\Delta G^\ddagger = 24.1\ kcal\ mol^{-1}$ ,  $\tau_{1/2} = 43321.7\ s$  at 300 K

#### Progressive curve of (*Z*)-1a $\rightarrow$ (*E*)-1a

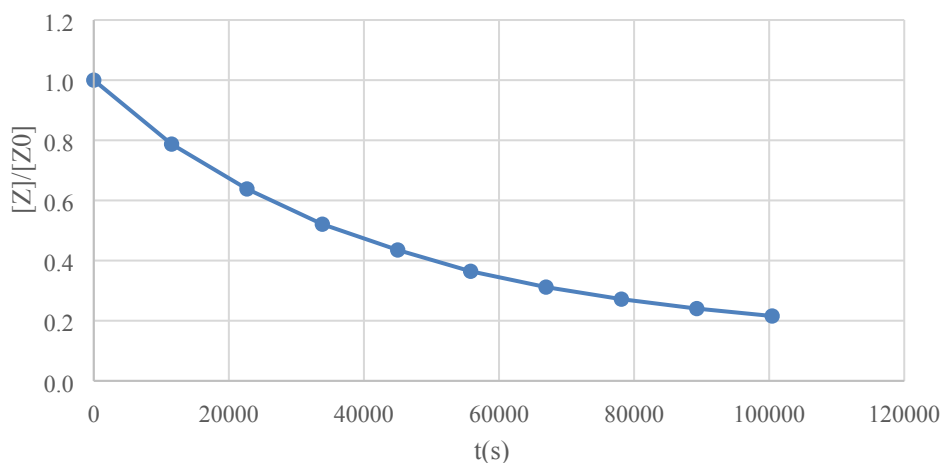

**Fig. ESI53.** Progressive curve for (*Z*)-1a into (*E*)-1a at T=300 K

### Linear regression

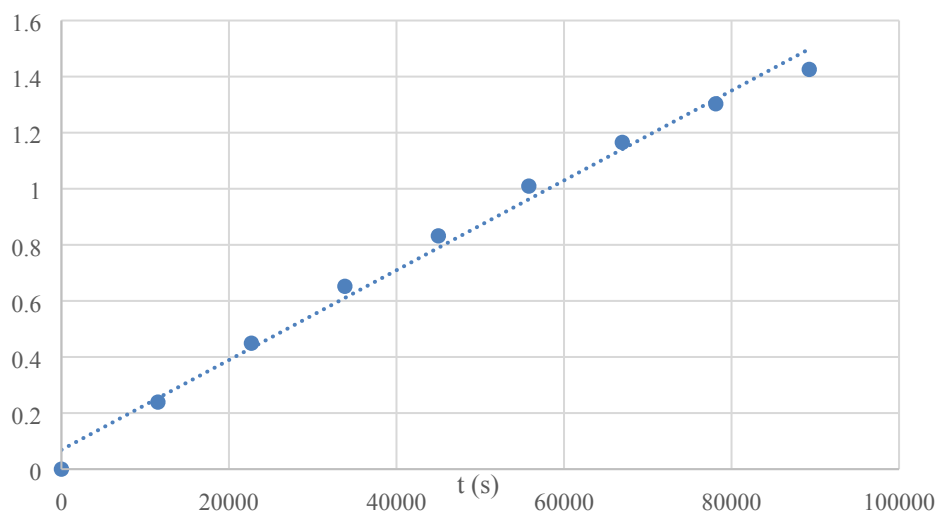

**Fig. ESI54.** Linear regression plot for **1a**.

### Thermal isomerization of (Z)-1b into (E)-1b at T=299 K

$k_{\text{obs}}=4.28 \cdot 10^{-4} \text{ s}^{-1}$ ,  $\Delta G^\ddagger=22.1 \text{ kcal mol}^{-1}$ ,  $\tau_{1/2}=1620.7 \text{ s}$  at 299 K

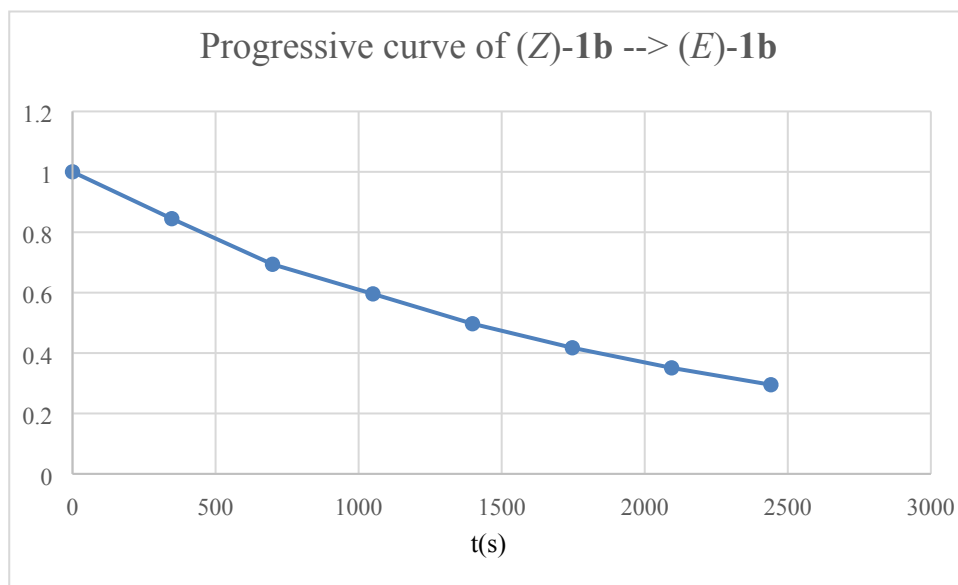

**Fig ESI55.** Progressive curve for (Z)-1b into (E)-1b at T=300 K

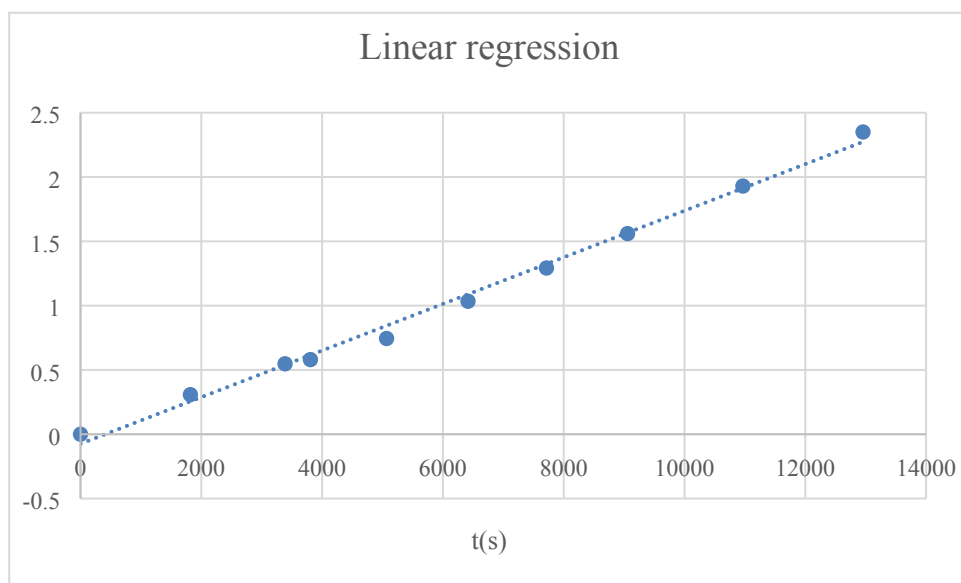

**Fig. ESI56.** Linear regression plot for **1b**.

**Thermal isomerization of (Z)-1c into (E)-1c at T=380 K**

$K_{\text{obs}}=1.81 \cdot 10^{-4} \text{ s}^{-1}$ ,  $\Delta G^\ddagger=28.9 \text{ kcal mol}^{-1}$ ,  $t_{1/2}=3829.5 \text{ s}$  at 380 K

**Progressive curve of (Z)-1c --> (E)-1c**

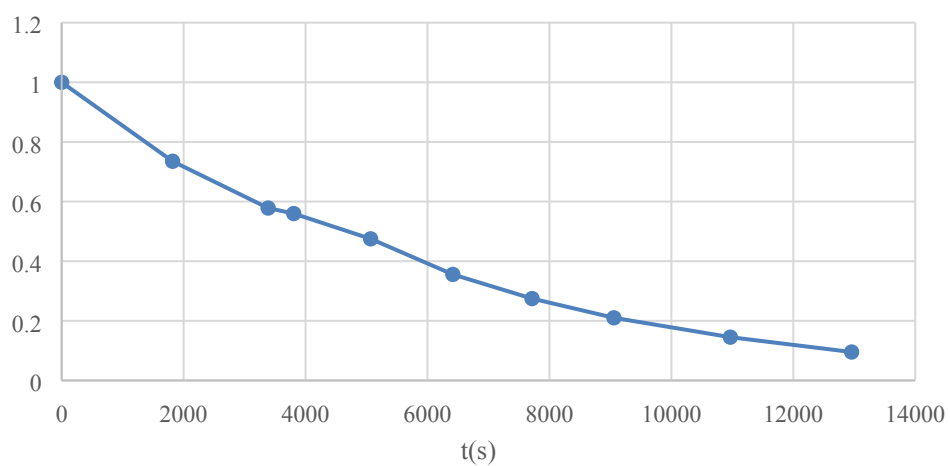

**Fig. ESI57.** Progressive curve for **(Z)-1c-> (E)-1c** at T=380K

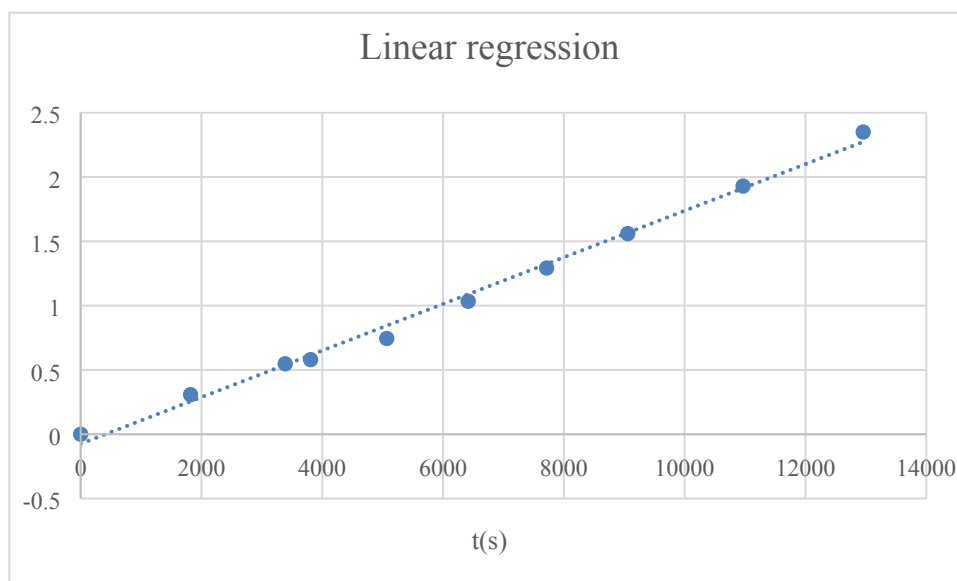

**Fig. ESI58.** Linear regression plot for **1c**

## 6. References

1. Dolomanov, O.V., Bourhis, L.J., Gildea, R.J, Howard, J.A.K. & Puschmann, H. (2009), *J. Appl. Cryst.* 42, 339-341.
2. Sheldrick, G.M. (2015). *Acta Cryst. A*71, 3-8.
3. Sheldrick, G.M. (2015). *Acta Cryst. C*71, 3-8.
